# Supplementary material for: Extubation from high-frequency oscillatory ventilation in extremely low birth weight infants: a prospective observational study
Source: PubMed Central journal article supplement — BMJ Paediatr Open. 2018 Nov 9;2(1):e000350. doi: 10.1136/bmjpo-2018-000350 (PMC6242018; doi:10.1136/bmjpo-2018-000350), 2018-11-09
Supplement: bmjpo-2018-000350.draft_revisions.pdf [file bmjpo-2018-000350.draft_revisions.pdf]

# BMJ Paediatrics Open

BMJ Paediatrics Open is committed to open peer review. As part of this commitment we make the peer review history of every article we publish publicly available.

When an article is published we post the peer reviewers' comments and the authors' responses online. We also post the versions of the paper that were used during peer review. These are the versions that the peer review comments apply to.

The versions of the paper that follow are the versions that were submitted during the peer review process. They are not the versions of record or the final published versions. They should not be cited or distributed as the published version of this manuscript.

BMJ Paediatrics Open is an open access journal and the full, final, typeset and author-corrected version of record of the manuscript is available on our site with no access controls, subscription charges or pay-per-view fees (<http://bmjpaedsopen.bmj.com>).

If you have any questions on BMJ Paediatrics Open's open peer review process please email [info.bmjpo@bmj.com](mailto:info.bmjpo@bmj.com)

## BMJ Paediatrics Open

### Extubation from high-frequency oscillatory ventilation in extremely low birth weight infants: a prospective observational study

|                               |                                                                                                                                                                                                                                                                                                                                                                                                                                                                                                                                                                                                                                                                                                                                                                                                                                                                                                                                                                                                                                                                                                                                                                                                                                                                                                                                                                                                                                                                                                                                                                                                                                                                                                                                                                                                                                                                                                                                                                                                                                                                                                                                                                                                                                                                                                                                                                                                                                                                                                                                                                                                                                                                                                         |
|-------------------------------|---------------------------------------------------------------------------------------------------------------------------------------------------------------------------------------------------------------------------------------------------------------------------------------------------------------------------------------------------------------------------------------------------------------------------------------------------------------------------------------------------------------------------------------------------------------------------------------------------------------------------------------------------------------------------------------------------------------------------------------------------------------------------------------------------------------------------------------------------------------------------------------------------------------------------------------------------------------------------------------------------------------------------------------------------------------------------------------------------------------------------------------------------------------------------------------------------------------------------------------------------------------------------------------------------------------------------------------------------------------------------------------------------------------------------------------------------------------------------------------------------------------------------------------------------------------------------------------------------------------------------------------------------------------------------------------------------------------------------------------------------------------------------------------------------------------------------------------------------------------------------------------------------------------------------------------------------------------------------------------------------------------------------------------------------------------------------------------------------------------------------------------------------------------------------------------------------------------------------------------------------------------------------------------------------------------------------------------------------------------------------------------------------------------------------------------------------------------------------------------------------------------------------------------------------------------------------------------------------------------------------------------------------------------------------------------------------------|
| Journal:                      | <i>BMJ Paediatrics Open</i>                                                                                                                                                                                                                                                                                                                                                                                                                                                                                                                                                                                                                                                                                                                                                                                                                                                                                                                                                                                                                                                                                                                                                                                                                                                                                                                                                                                                                                                                                                                                                                                                                                                                                                                                                                                                                                                                                                                                                                                                                                                                                                                                                                                                                                                                                                                                                                                                                                                                                                                                                                                                                                                                             |
| Manuscript ID                 | bmjpo-2018-000350                                                                                                                                                                                                                                                                                                                                                                                                                                                                                                                                                                                                                                                                                                                                                                                                                                                                                                                                                                                                                                                                                                                                                                                                                                                                                                                                                                                                                                                                                                                                                                                                                                                                                                                                                                                                                                                                                                                                                                                                                                                                                                                                                                                                                                                                                                                                                                                                                                                                                                                                                                                                                                                                                       |
| Article Type:                 | Original article                                                                                                                                                                                                                                                                                                                                                                                                                                                                                                                                                                                                                                                                                                                                                                                                                                                                                                                                                                                                                                                                                                                                                                                                                                                                                                                                                                                                                                                                                                                                                                                                                                                                                                                                                                                                                                                                                                                                                                                                                                                                                                                                                                                                                                                                                                                                                                                                                                                                                                                                                                                                                                                                                        |
| Date Submitted by the Author: | 19-Jul-2018                                                                                                                                                                                                                                                                                                                                                                                                                                                                                                                                                                                                                                                                                                                                                                                                                                                                                                                                                                                                                                                                                                                                                                                                                                                                                                                                                                                                                                                                                                                                                                                                                                                                                                                                                                                                                                                                                                                                                                                                                                                                                                                                                                                                                                                                                                                                                                                                                                                                                                                                                                                                                                                                                             |
| Complete List of Authors:     | <p>Tana, Milena; Unità Operativa Complessa di Neonatologia, Area Salute del bambino, Dipartimento di Scienza della Salute della Donna e del Bambino. Fondazione Policlinico Universitario A. Gemelli IRCCS, Roma.</p> <p>Lio, Alessandra; Unità Operativa Complessa di Neonatologia, Area Salute del bambino, Dipartimento di Scienza della Salute della Donna e del Bambino. Fondazione Policlinico Universitario A. Gemelli IRCCS, Roma.</p> <p>Tirone, Chiara; Unità Operativa Complessa di Neonatologia, Area Salute del bambino, Dipartimento di Scienza della Salute della Donna e del Bambino. Fondazione Policlinico Universitario A. Gemelli IRCCS, Roma.</p> <p>Aurilia, Claudia; Unità Operativa Complessa di Neonatologia, Area Salute del bambino, Dipartimento di Scienza della Salute della Donna e del Bambino. Fondazione Policlinico Universitario A. Gemelli IRCCS, Roma.</p> <p>Tiberi, Eloisa; Unità Operativa Complessa di Neonatologia, Area Salute del bambino, Dipartimento di Scienza della Salute della Donna e del Bambino. Fondazione Policlinico Universitario A. Gemelli IRCCS, Roma.</p> <p>Serrao, Francesca; Unità Operativa Complessa di Neonatologia, Area Salute del bambino, Dipartimento di Scienza della Salute della Donna e del Bambino. Fondazione Policlinico Universitario A. Gemelli IRCCS, Roma.</p> <p>Purcaro, Velia; Unità Operativa Complessa di Neonatologia, Area Salute del bambino, Dipartimento di Scienza della Salute della Donna e del Bambino. Fondazione Policlinico Universitario A. Gemelli IRCCS, Roma.</p> <p>Corsello, Mirta; Unità Operativa Complessa di Neonatologia, Area Salute del bambino, Dipartimento di Scienza della Salute della Donna e del Bambino. Fondazione Policlinico Universitario A. Gemelli IRCCS, Roma.</p> <p>Catenazzi, Piero; Unità Operativa Complessa di Neonatologia, Area Salute del bambino, Dipartimento di Scienza della Salute della Donna e del Bambino. Fondazione Policlinico Universitario A. Gemelli IRCCS, Roma.</p> <p>D'Andrea, Vito; Unità Operativa Complessa di Neonatologia, Area Salute del bambino, Dipartimento di Scienza della Salute della Donna e del Bambino. Fondazione Policlinico Universitario A. Gemelli IRCCS, Roma.</p> <p>Barone, Giovanni; Unità Operativa Complessa di Neonatologia, Area Salute del bambino, Dipartimento di Scienza della Salute della Donna e del Bambino. Fondazione Policlinico Universitario A. Gemelli IRCCS, Roma.</p> <p>Ricci, Cinzia; Unità Operativa Complessa di Neonatologia, Area Salute del bambino, Dipartimento di Scienza della Salute della Donna e del Bambino. Fondazione Policlinico Universitario A. Gemelli IRCCS, Roma.</p> |

1  
2  
3  
4  
5  
6  
7  
8  
9  
10  
11  
12  
13  
14  
15  
16  
17  
18  
19  
20  
21  
22  
23  
24  
25  
26  
27  
28  
29  
30  
31  
32  
33  
34  
35  
36  
37  
38  
39  
40  
41  
42  
43  
44  
45  
46  
47  
48  
49  
50  
51  
52  
53  
54  
55  
56  
57  
58  
59  
60

|           |                                                                                                                                                                                                                                                                                                                                                                    |
|-----------|--------------------------------------------------------------------------------------------------------------------------------------------------------------------------------------------------------------------------------------------------------------------------------------------------------------------------------------------------------------------|
|           | Pastorino, Roberta; Università Cattolica del Sacro Cuore ; Section of Hygiene, Institute of Public Health, Vento, Giovanni; Unità Operativa Complessa di Neonatologia, Area Salute del bambino, Dipartimento di Scienza della Salute della Donna e del Bambino. Fondazione Policlinico Universitario A. Gemelli IRCCS, Roma - Università Cattolica del Sacro Cuore |
| Keywords: | Neonatology                                                                                                                                                                                                                                                                                                                                                        |
|           |                                                                                                                                                                                                                                                                                                                                                                    |

SCHOLARONE™  
Manuscripts

Confidential: For Review Only

1  
2  
3 **Extubation from high-frequency oscillatory ventilation in extremely low birth weight infants:**  
4 **a prospective observational study**  
5  
6

7 Milena Tana<sup>1</sup>, Alessandra Lio<sup>1</sup>, Chiara Tirone<sup>1</sup>, Claudia Aurilia<sup>1</sup>, Eloisa Tiberi<sup>1</sup>, Francesca Serrao<sup>1</sup>,  
8 Velia Purcaro<sup>1</sup>, Mirta Corsello<sup>1</sup>, Piero Catenazzi<sup>1</sup>, Vito D'Andrea<sup>1</sup>, Giovanni Barone<sup>1</sup>, Cinzia  
9 Ricci<sup>1</sup>, Roberta Pastorino<sup>2</sup>, Giovanni Vento<sup>3</sup>  
10

11 <sup>1</sup>Unità Operativa Complessa di Neonatologia, Area Salute del bambino, Dipartimento di Scienza  
12 della Salute della Donna e del Bambino. Fondazione Policlinico Universitario A. Gemelli IRCCS,  
13 Roma.  
14

15 <sup>2</sup>Section of Hygiene, Institute of Public Health, Università Cattolica del Sacro Cuore, Largo  
16 Francesco Vito 1, 00168 Rome, Italy.  
17

18 <sup>3</sup>Unità Operativa Complessa di Neonatologia, Area Salute del bambino, Dipartimento di Scienza  
19 della Salute della Donna e del Bambino. Fondazione Policlinico Universitario A. Gemelli IRCCS,  
20 Roma - Università Cattolica del Sacro Cuore  
21

22  
23  
24  
25  
26 **E-mail addresses:**

27 Milena Tana: [milenatana@yahoo.it](mailto:milenatana@yahoo.it)

28 Alessandra Lio: [alelio@hotmail.it](mailto:alelio@hotmail.it)

29 Chiara Tirone: [chiaratirone@tiscali.it](mailto:chiaratirone@tiscali.it)

30 Claudia Aurilia: [claudiaurilia@hotmail.it](mailto:claudiaurilia@hotmail.it)

31 Eloisa Tiberi: [eloisatiberi@yahoo.it](mailto:eloisatiberi@yahoo.it)

32 Francesca Serrao: [francesca.serrao@yahoo.it](mailto:francesca.serrao@yahoo.it)

33 Velia Purcaro: [veliapurcaro@yahoo.it](mailto:veliapurcaro@yahoo.it)

34 Mirta Corsello: [mirtacors@hotmail.it](mailto:mirtacors@hotmail.it)

35 Piero Catenazzi: [piero.catenazzi@gmail.com](mailto:piero.catenazzi@gmail.com)

36 Vito D'Andrea: [dandrea.vito@gmail.com](mailto:dandrea.vito@gmail.com)

37 Giovanni Barone: [gbarone85@yahoo.it](mailto:gbarone85@yahoo.it)

38 Cinzia Ricci: [cinziar87@hotmail.it](mailto:cinziar87@hotmail.it)

39 Roberta Pastorino: [roberta.pastorino@unicatt.it](mailto:roberta.pastorino@unicatt.it)

40 Giovanni Vento: [giovanni.vento@unicatt.it](mailto:giovanni.vento@unicatt.it)

41  
42  
43  
44 **Address correspondence to:** Giovanni Vento, Unità Operativa Complessa di Neonatologia, Area  
45 Salute del bambino, Dipartimento di Scienza della Salute della Donna e del Bambino. Fondazione  
46 Policlinico Universitario A. Gemelli IRCCS, Roma - Università Cattolica del Sacro Cuore.

47 Largo A. Gemelli, 8 00168 Rome, Italy [[giovanni.vento@unicatt.it](mailto:giovanni.vento@unicatt.it)], Phone ++39-06-30154357;

48 Fax ++39-06-338321  
49  
50

**Abstract**

**Objective:** To evaluate if weaning from high frequency oscillatory ventilation (HFOV) directly to a non-invasive mode of respiratory support is feasible and results in successful extubation in extremely low birth weight (ELBW) infants.

**Design:** Prospective observational study

**Setting:** Tertiary neonatal intensive care unit.

**Patients:** One hundred and eight ELBW infants of  $26.2 \pm 1.4$  weeks of gestational age directly extubated from HFOV.

**Interventions:** All infants were managed with elective HFOV and received surfactant after a recruitment HFOV maneuver. Extubation was attempted at mean airways pressure (MAP)  $\leq 6$  cmH<sub>2</sub>O with  $FiO_2 \leq 0.25$ . After extubation all infants were supported by nasal CPAP (6-8 cm H<sub>2</sub>O).

**Main Outcome measures:** Extubation failure (clinical deterioration requiring re-intubation) was defined as shorter than 7 days.

**Results** Ninety patients (83%) were successfully extubated and 18 (17%) required re-intubation. No significant differences were found between the two groups in terms of birth weight, day of life and weight at the time of extubation. Multivariable analysis showed that gestational age (OR 1.71; 95% CI 1.04, 2.08) and higher MAP prior to surfactant (OR 1.51; 95% CI 1.06, 2.15) were associated with successful extubation.

**Conclusions:** In ELBW infants direct extubation from HFOV at MAP  $\leq 6$  cm H<sub>2</sub>O with  $FiO_2 \leq 0.25$  is feasible. Our extubation success rate (83%) is higher than conventional mechanical ventilation in this very vulnerable class of infants, and the association of higher MAP prior to surfactant with successful extubation underlines the importance of an optimal lung volume recruitment maneuver.

**Key words:** HFOV, extubation criteria, ELBW infants, Respiratory distress syndrome, Mean airway pressure

## Introduction

Despite the increased use of non-invasive respiratory support, mechanical ventilation may be life-saving in preterm infants with respiratory failure, especially in extremely low birth weight (ELBW) infants (birth weight < 1000 g) (1, 2). A prolonged endotracheal intubation is associated with risks and complications including bronchopulmonary dysplasia (BPD) (1-6), therefore clinicians should wean and extubate ELBW infants as soon as possible (7). Several studies tried to find the optimal timing of extubation of preterm infants treated with conventional mechanical ventilation (CMV) (8-14). In these studies success of extubation in ELBW infants ranges from 52% to 73% (8, 14), and this is why extubation failure remains a major problem. In the last years high-frequency oscillatory ventilation (HFOV) has been increasingly used in preterm infants with respiratory failure, because early HFOV could reduce risk of BPD (15), especially if associated with an open lung strategy (16,17). Despite that, data on weaning and extubation criteria are limited, especially in ELBW infants. Some clinicians are more comfortable in switching from HFOV to CMV to wean and extubate the infants (18), but this combined strategy could reduce the efficacy of HFOV alone to decrease the incidence of BPD (19). Direct extubation from HFOV is possible and may even be desirable (7, 16). van Velzen et al. showed that weaning the mean airways pressure (MAP) below 8 cmH<sub>2</sub>O with a fraction of inspired oxygen (FiO<sub>2</sub>) below 0.30 is feasible during open lung HFOV and direct extubation at these settings is successful in 90% of preterm infants < 37 weeks of gestational age (GA), but the success rate dropped to 81% in 68 ELBW studied infants (20).

The aim of the present study was to evaluate in a cohort of ELBW infants treated with elective open lung HFOV if MAP ≤ 6 cm H<sub>2</sub>O and FiO<sub>2</sub> ≤ 0.25 are feasible and associated with successful direct HFOV extubation, considering a window of observation of 7 days, because longer periods may be necessary to adequately capture this outcome in ELBW infants (13, 14).

## Methods

### Patients

This study was approved by the Ethics Committee of the Department of Pediatrics of Fondazione Policlinico Universitario A. Gemelli IRCCS, Roma - Università Cattolica del Sacro Cuore, which waived the need for parental consent. Between June 2011 and June 2014 inborn ELBW infants with a diagnosis of respiratory distress syndrome (RDS), requiring endotracheal intubation at birth or failing nasal continuous positive airway pressure (CPAP) within 24 hours of life, electively HFOV ventilated and receiving surfactant treatment, were included in this prospective observational study if they were directly extubated from HFOV.

### HFOV strategy

HFOV is actually the elective modality of ventilation in preterm newborns with GA  $\leq$  27 weeks and/or ELBW infants in our NICU, as result of our previous randomized controlled trial comparing the effects of HFOV vs CMV (21). HFOV was delivered by a Dräger Babylog 8000 *plus* ventilator (Dräger, Lubeck, Germany) with “optimum lung volume strategy“ prior to surfactant administration, recruiting collapsed alveoli using oxygenation with a FiO<sub>2</sub> target  $\leq$  0.25 as an indirect parameter for lung volume (17).

Ventilation was started at a MAP of 10 cmH<sub>2</sub>O, a frequency of 10 Hz, and an amplitude of 30% increased if necessary until the infant’s chest was seen to be «visibly vibrating ». The FiO<sub>2</sub> was initially set to ensure adequate oxygen saturation (SpO<sub>2</sub> 90-95%). If the FiO<sub>2</sub> was  $>$  0.25 the MAP was increased by 1-2 cmH<sub>2</sub>O every 2-5 minutes until FiO<sub>2</sub> was  $\leq$  0.25. The recruitment was stopped if oxygenation no longer improved or there were signs of lung hyperinflation (capillary refill time  $>$  3 seconds and/or hypotension). This approach provides a more effective means to recruit and protect acutely injured lungs (17). Surfactant was administered at the end of the recruitment procedure. Transcutaneous partial pressure of CO<sub>2</sub> (TcPCO<sub>2</sub>) and/or PaCO<sub>2</sub> were managed by adjustment of the oscillatory amplitude and then of the frequency. The goals of respiratory management were to maintain blood gas values of: pH 7.30-7.45, PaCO<sub>2</sub> and/or TcPCO<sub>2</sub> 45-55 mm

Hg, PaO<sub>2</sub> and/or transcutaneous partial pressure of O<sub>2</sub> (TcPO<sub>2</sub>) 50-70 mm Hg and SpO<sub>2</sub> 90-95%. All patients received a loading dose of caffeine (20 mg/kg) immediately after admission to the NICU, then maintenance therapy (22) and Remifentanyl by continuous intravenous infusion at a dose of 0.075 µg/kg/min to provide analgesia during HFOV while preserving spontaneous respiratory activity (23).

### **Weaning and extubation criteria**

HFOV ventilation was managed to ensure to patients the lowest possible MAP, amplitude and FiO<sub>2</sub> to minimize ventilator-induced lung injury. Reduction in MAP was gradually accomplished following oxygenation and lung expansion estimated by chest radiographs. FiO<sub>2</sub> was adjusted to maintain adequate oxygenation. Reduction of amplitude was gradually accomplished following TcPCO<sub>2</sub> and/or PaCO<sub>2</sub> values. Extubation was attempted when the neonate's condition remained stable for at least 6 hours receiving ventilation with MAP ≤ 6 cm H<sub>2</sub>O and FiO<sub>2</sub> ≤ 0.25. At that point in time a FiO<sub>2</sub> > 0.25 but ≤ 0.30 was accepted, to ensure that the extubation was not delayed by small fluctuations in oxygen need.

After extubation all the patients were supported by nasal CPAP at 6-8 cmH<sub>2</sub>O using size-appropriate short binasal prongs. Extubation failure was defined as clinical deterioration requiring re-intubation within the following 7 days (13,14). All data refer only to the first extubation attempt in the studied neonates.

The indications for reintubation were: a) repeated episodes of apnea defined as >4 episodes of apnea per hour or >2 episodes of apnea per hour when ventilation with bag and mask was required; b) hypoxia defined as FiO<sub>2</sub> > 0.50 to maintain SpO<sub>2</sub> 90-95% for more than 2 hours despite 8 cm H<sub>2</sub>O of CPAP, c) development of respiratory acidosis indicated by 2 consecutive blood gases with PaCO<sub>2</sub> ≥ 65 mm Hg and pH < 7.20.

### **Data collection**

Demographic data on patient and maternal characteristics were collected from each patient. Data on MAP, FiO<sub>2</sub>, amplitude, frequency, DCO<sub>2</sub>, Tidal Volume HFOV (V<sub>T</sub>), TcPO<sub>2</sub>, TcPCO<sub>2</sub> at start of



1  
2  
3 ventilation and at the time of extubation attempt were collected. Finally, data on MAP and FiO<sub>2</sub>  
4 were collected at the end of HFOV recruitment procedure, immediately prior to surfactant  
5 administration. The number of patients failing extubation was collected, including the main reason  
6 for failure and the time of re-intubation. Weight and day of life at extubation, duration of  
7 mechanical ventilation and O<sub>2</sub>-therapy during the hospital stay, requirement of additional doses of  
8 surfactant and development of BPD (O<sub>2</sub>-dependence at 36 weeks of postmenstrual age) were also  
9 reported for each patient.  
10  
11  
12  
13  
14  
15  
16

### 17 **Statistical analysis**

18  
19 Values were expressed as mean and SD or median and range for continuous variables or absolute  
20 frequency and percentages for categorical variables. Continuous variables were compared with  
21 parametric (Student's t test) or non-parametric (Mann Whitney U test) tests as appropriate.  
22 Categorical variables were compared by using a two-tailed Fisher's exact test. A 2-tailed value of  
23 p<0.05 was considered significant. Data were analysed using commercial statistical software  
24 (Graphpad Prism V.5.0a; Chicago, Illinois, USA).  
25  
26  
27  
28  
29  
30  
31  
32

33 In order to evaluate the association between the successful extubation and each explanatory  
34 variable, a univariable analysis was performed using a logistic regression model by including one  
35 variable at a time. The independent variables found to be significant in the univariable analyses (p  
36 value ≤ 0.05) were included in the multivariable model. A likelihood ratio test was used to compare  
37 the goodness of fit of the models and for selection of the most appropriate model. Statistical  
38 analyses were done with Stata version 2013 software (Stata Statistical Software: Release 13,  
39 College Station, Texas, USA).  
40  
41  
42  
43  
44  
45  
46  
47  
48  
49

### 50 **Results**

51  
52 During the study period 108 ELBW infants with RDS required elective HFOV within 24 hours of  
53 life and were directly extubated from HFOV. Extubation was attempted at a median [range] age of  
54 4 [1-53] days (Table 1). All the comparisons were made between newborns successfully extubated  
55  
56  
57  
58  
59  
60

1  
2  
3 (Extubation Success Group) and newborns failing the extubation attempt (Extubation Failure  
4 Group). The percentage of newborns successfully extubated was 83%. The only significant  
5 differences between the two groups were the higher percentage of male sex in the neonates who  
6 failed extubation and their lower GA (Table 1). Eighteen infants met failure criteria within 7 days  
7 after extubation, 7 (39%) failed due to apnea, 6 (33%) due to hypoxia, and 5 (28%) due to increased  
8 PaCO<sub>2</sub>.

9  
10  
11 Regarding to the ventilator setting at the baseline, no significant differences were observed between  
12 the two groups (Table 2). Prior to surfactant administration, the neonates of the Extubation Success  
13 Group received ventilation with a significantly higher MAP and lower FiO<sub>2</sub> (p< 0.02 and p<0.001  
14 respectively) respect to the newborns of the Extubation Failure Group (Table 2). At extubation,  
15 there were no differences in MAP, FiO<sub>2</sub>, amplitude, or frequency between infants who were  
16 successfully extubated or those who failed extubation (Table 2).

17  
18 Finally, the neonates of Extubation Failure Group required treatment with additional doses of  
19 surfactant more frequently than infants of Extubation Success Group (p=0.006) and received a  
20 significantly longer period of mechanical ventilation (p=0.02) (Table 3). Although the neonates of  
21 the Extubation Failure Group had a higher percentage of BPD, the difference was not statistically  
22 significant (Table 3).

23  
24 Multivariable analysis showed that GA (OR 1.71; 95% CI 1.04, 2.08) and higher MAP prior to  
25 surfactant (OR 1.51; 95% CI 1.06, 2.15) were associated with successful extubation (Table 4).

## 26 27 28 29 30 31 32 33 34 35 36 37 38 39 40 41 42 43 44 45 46 **Discussion**

47  
48 To our knowledge, this is the first report providing more detailed data on the extubation process  
49 during HFOV in a large cohort of ELBW infants. In fact, the only experience on the successful  
50 extubation rates directly from HFOV is that reported by van Velzen et al (20), but it referred to a  
51 heterogeneous population of 214 preterm infants, including only 68 neonates with a birth weight  
52 ≤1000 g. Moreover, our study evaluated the success or failure of the extubation attempt over a  
53  
54  
55  
56  
57  
58  
59  
60

1  
2  
3 longer period of time (within 7 days), compared to the usually shorter time windows ( $\leq 48$  or  $\leq 72$   
4 hours after extubation). This is particularly important, considering the recent remarks by Giaccone  
5 et al. (13), who showed that in studies predominately enrolling ELBW infants, rates of extubation  
6 success were negatively associated with the duration of observation. By relying on shorter windows  
7 of observation, studies enrolling a large proportion of small infants may therefore underestimate the  
8 true rate of reintubation. In fact, the reintubation rate did not appear to plateau even at a week of  
9 observation, indicating that longer periods may be necessary to adequately capture this outcome in  
10 ELBW infants (13).

11  
12  
13  
14  
15  
16  
17  
18  
19  
20 In our experience neonates of the Extubation Failure Group prior to surfactant administration  
21 received ventilation with a significantly lower MAP ( $p < 0.05$ ) and a significantly higher  $FiO_2$   
22 ( $p < 0.001$ ) respect to the newborns of the Extubation Success Group (Table 2). A lower MAP prior  
23 surfactant was confirmed by multivariable analysis as an independent risk factor for extubation  
24 failure (Table 2 e 4). This occurred despite our protocol of optimal lung volume strategy aiming to  
25 fully recruit the lung before surfactant therapy, increasing MAP step-by-step until the target  $FiO_2$  of  
26 0.25 had been reached: in case of the neonates who failed extubation, surfactant had been  
27 administered before achieving optimal lung recruitment. Even though they were affected by a more  
28 severe RDS, as demonstrated by the higher baseline  $FiO_2$  respect to the neonates who experienced  
29 successful extubation, the importance of fully recruit the lung before surfactant administration  
30 should be taken into account, because of the significant association of optimal lung volume strategy  
31 with better respiratory outcomes (17). Neonates of the Extubation Failure Group received in fact  
32 more frequently additional surfactant doses (Table 3).

33  
34  
35  
36  
37  
38  
39  
40  
41  
42  
43  
44  
45  
46  
47  
48 Compared to the only study reporting the feasibility of weaning and direct extubation from HFOV  
49 in ELBW infants (20), our data showed slightly higher rates of successful extubation: 83% within 7  
50 days after the extubation attempt, vs 81% within 48 hours only, respectively. More importantly, our  
51 rates of extubation failure are lower than those recently reported by Giaccone et al. in a recent  
52 systematic review on the definition of extubation success in very premature infants (13). In the  
53  
54  
55  
56  
57  
58  
59  
60

1  
2  
3 multivariable linear regression analysis, median subject's birth weight  $\leq 1000$  g was found to be an  
4 effect modifier ( $p=0.03$ ) of the association between duration of post-extubation observation and rate  
5 of reintubation. After stratifying the analysis for this variable, the authors found that in studies of  
6  
7 infants with median birth weight  $\leq 1000$  g, the reintubation rate increased significantly with longer  
8  
9 duration of observation ( $p=0.001$ ). In particular, the mean reintubation rate in the newborns with  
10  
11 median birth weight  $\leq 1000$  g increased from 25% at 72 hours until 35% at 168 hours, being this  
12  
13 latter result more than double of that reported in our experience (17%).  
14  
15

16  
17 In our study the neonates failing extubation had significantly lower GA compared with infants  
18  
19 successfully extubated, being the lower GA an independent risk factor for extubation failure in the  
20  
21 multivariable analysis (Table 1 e 4). Apnea was the main reason for reintubation (39% of cases)  
22  
23 stressing the important role of the central inspiratory drive in the determinism of the premature  
24  
25 infant's ability to maintain adequate, independent ventilation. The use of other non-invasive  
26  
27 respiratory support, alternatives to CPAP alone in the post-extubation period (i.e. nasal intermittent  
28  
29 mandatory ventilation and/or bilevel CPAP) might be a better strategy to overcome this problem.  
30  
31 Recently Buzzella et al showed that in preterm infants with residual lung disease nasal CPAP in the  
32  
33 range of 7-9 cmH<sub>2</sub>O was more effective in reducing extubation failure than range of 4-6 cmH<sub>2</sub>O  
34  
35 (24). These findings suggest the need for higher distending pressure post-extubation to obtain better  
36  
37 oxygenation with a more stable lung volume and reduced pulmonary shunt in the more immature  
38  
39 infants who are still oxygen dependent; the improved oxygenation and lung volume stability may  
40  
41 have also attenuated central and obstructive apnea (24). Hypoxia and hypercapnia accounted for  
42  
43 most of extubation failure attempts after the first 24 hours (8 out of 13, 61%): a recruitment  
44  
45 maneuver trying to adequately open the lung could play an important role in preventing extubation  
46  
47 failure, as suggested by the results of multivariable analysis.  
48  
49

50  
51 Although our study suggests that direct extubation from HFOV is feasible in ELBW infants, there  
52  
53 are some limitations and important questions that remain to be answered. First of all the small  
54  
55 number of ELBW infants failing extubation could limit the power to detect differences between  
56  
57  
58  
59

1  
2  
3 groups and might have affected the accuracy of our estimates. Moreover, higher level of CPAP post  
4 extubation (7-9 cm H<sub>2</sub>O) or other non-invasive respiratory support such as synchronized nasal IPPV  
5 (25) or nasal HFOV (26) could be used to improve the success rate of extubation in ELBW infants.  
6  
7

8  
9 Future randomized controlled trials will have to address these questions also taking into account the  
10 possible effects on long-term respiratory outcomes.  
11

12  
13 In conclusion, this study shows that in ELBW infants electively HFOV ventilated with an open lung  
14 strategy, direct extubation from HFOV at MAP  $\leq$  6 cm H<sub>2</sub>O with FiO<sub>2</sub>  $\leq$  0.25 is feasible. Our  
15 extubation success rate (83%) is comparable or also higher than success rate reported for extubation  
16 from conventional mechanical ventilation in this very vulnerable class of infants.  
17  
18  
19  
20  
21  
22  
23  
24  
25  
26  
27  
28  
29  
30  
31  
32  
33  
34  
35  
36  
37  
38  
39  
40  
41  
42  
43  
44  
45  
46  
47  
48  
49  
50  
51  
52  
53  
54  
55  
56  
57  
58  
59  
60

## Declarations

*Funding* This research received no specific grant from any funding agency in the public, commercial or not-for-profit sectors.

*Ethical Approval* This study was approved by the Ethics Committee of the Department of Pediatrics of Fondazione Policlinico Universitario A. Gemelli IRCCS, Rome, Italy - Università Cattolica del Sacro Cuore.

*Availability of data and material* The datasets used and/or analysed during the current study are available from the corresponding author on reasonable request.

*Competing interests* The authors declare that they have no competing interests.

### *Authors contributions*

MT designed the study, collected the data, analyzed the data, and wrote the first and final drafts of the manuscript. AL carried out the data collection and the literature search, assisted with the analysis, and provided significant edits to the manuscript. CT e CA carried out the data collection and drafted the initial manuscript. ET carried out the data collection and the initial analyses, reviewed and revised the manuscript. FS carried out the data collection, the literature search, reviewed and revised the manuscript. VP carried out the data collection, the literature search, reviewed and revised the manuscript. MC and PC carried out the data collection, the literature search, reviewed and revised the manuscript. VD, GB and CR carried out the data collection, the literature search, reviewed and made significant edits to the manuscript. RP carried out statistical analysis GV conceptualized and designed the study and critically reviewed the manuscript. All authors read and approved the submission of this version of the manuscript.

## Acknowledgments

We thank the families of patients for their understanding cooperation and the nursing staff for its invaluable support.

**What is already known on this topic**

1. Several studies founded the optimal timing of extubation during conventional mechanical ventilation, but extubation failure in ELBW infants remains a major problem.
2. Extubation directly from HFOV is possible and desirable. In one study the 90% success rate in preterm infants dropped to 81% in ELBW infants.
3. In infants with birth weight  $\leq 1000$  g, a window of observation of 7 days may be necessary to adequately capture who will require reintubation

**What this study adds**

1. In ELBW infants electively HFOV ventilated, direct extubation at  $MAP \leq 6$  cm  $H_2O$  with  $FiO_2 \leq 0.25$  is feasible.
2. Our success rate 7 days after the extubation attempt (83%) is higher than that reported for extubation from conventional mechanical ventilation in ELBW infants.
3. A recruitment HFOV maneuver prior to surfactant administration is associated with successful extubation.

## References

1. Support Study Group of the Eunice Kennedy Shriver NICHD Neonatal Research Network, Finer NN, Carlo WA, et al. Early CPAP versus surfactant in extremely preterm infants. *N Engl J Med* 2010; 362: 1970-9.
2. Morley CJ, Davis PG, Doyle LW, et al. Nasal CPAP or intubation at birth for very preterm infants. *N Engl J Med* 2008; 358 (7): 700-8.
3. Stoll BJ, Hansen NI, Bell EF, et al. Neonatal outcomes of extremely low birth weight infants from the NICHD neonatal research network. *Pediatrics* 2010; 126 (3): 443-56.
4. Miller JD, Carlo WA. Pulmonary complications of mechanical ventilation in neonates. *Clin Perinatol* 2008; 35 (1): 273-81.
5. Garland JS. Strategies to prevent ventilator-associated pneumonia in neonates. *Clin Perinatol* 2010; 37 (3): 629-43.
6. Walsh MC, Morris BH, Wraga La, et al. Extremely low birth weight neonates with protracted ventilation: mortality and 18-month neurodevelopmental outcomes. *J Pediatr* 2005; 146 (6): 798-804.
7. Sant'Anna GM, Keszler M. Weaning Infants from Mechanical Ventilation. *Clin Perinatol* 2012; (3):543-62
8. Vento G, Tortorolo L, Zecca E, et al: Spontaneous minute ventilation is a predictor of extubation failure in extremely-low-birth-weight infants. *J Matern Fetal Neonatal Med* 2004; 15: 147-54.
9. Dimitriou G, Greenough A, Endo A, et al: Prediction of extubation failure in preterm infants. *Arch Dis Child Fetal Neonatal Ed* 2002; 86 (1): F32-F35.
10. Szymankiewicz M, Vidyasagar D, Gadzinowski J: Predictors of successful extubation of preterm infants with respiratory distress syndrome. *Pediatr Crit Care Med* 2005; 6: 44-49.
11. Kamlin CO, Davis PG, Morley CJ: Predicting successful extubation of very low birth weight infants. *Arch Dis Child Fetal Neonatal Ed* 2006 May; 91(3): F180-F183.



12. Stefanescu BM, Murphy WP, Hansell BJ, et al. A randomized, controlled trial comparing two different continuous positive airway pressure systems for the successful extubation of extremely low birth weight infants. *Pediatrics* 2003; 112(5): 1031-8.
13. Giaccone A, Jensen E, Davis PG, et al. Definitions of extubation success in very premature infants: a systematic review. *Arch Dis Child Fetal Neonatal Ed.* 2014;99:F124-7.
14. Manley BJ, Doyle LW, Owen LS, et al. Extubating Extremely Preterm Infants: Predictors of Success and Outcomes following Failure. *J Pediatr.* 2016 Jun;173:45-9.
15. Cools F, Offringa M, Askie LM. Elective high frequency oscillatory ventilation versus conventional ventilation for acute pulmonary dysfunction in preterm infants. *Cochrane database Syst Rev.* 2015;3:CD000104.
16. Courtney SE, Durand DJ, Asselin JM, et al. High frequency oscillatory ventilation versus conventional mechanical ventilation for very low birth weight infants. *N Engl J Med* 2002; 347: 643-652.
17. Tana M, Zecca E, Tirone C, et al. Target fraction of inspired oxygen during open lung strategy in neonatal high frequency oscillatory ventilation: a retrospective study. *Minerva Anesthesiol* 2012;78(2):151-159.
18. Johnson AH, Peacock JL, Greenough A, et al: High-frequency oscillatory ventilation for the prevention of chronic lung disease of prematurity. *N Engl J Med* 2002; 347: 633-642.
19. Clark RH, Gerstmann DR, Null DM Jr, et al: Prospective randomized comparison of high-frequency oscillatory and conventional ventilation in respiratory distress syndrome. *Pediatrics* 1992; 89 (1): 5-12.
20. van Velzen A, De Jaegere A, van der Lee J, et al. Feasibility of weaning and direct extubation from open lung high-frequency ventilation in preterm infants. *Pediatr Crit Care Med.* 2009 Jan;10(1):71-5.

- 1  
2  
3 21. Vento G, Matassa PG, Ameglio F, et al. HFOV in premature neonates: effects on pulmonary  
4 mechanics and epithelial lining fluid cytokines. A randomized controlled trial. *Intensive*  
5 *Care Med* 2005;31:463-470.  
6  
7  
8  
9 22. Schimdt B, Roberts RS, Davis P, et al. Caffeine therapy for apnea of prematurity. *N Engl J*  
10 *Med.* 2006; 354 (20): 2112-21.  
11  
12  
13 23. Giannantonio C, Sammartino M, Valente E, et al. Remifentanil analgesedation in preterm  
14 newborns during mechanical ventilation. *Acta Paediatr* 2009;98(7):1111-1115.  
15  
16  
17 24. Buzzella B, Claire N, D'Ugard C, et al. A randomized controlled trial of two nasal  
18 continuous positive airway pressure levels after extubation in preterm infants. *J Pediatr*  
19 2014 Jan;164(1):46-51.  
20  
21  
22 25. Gizzi C, Montecchia F, Panetta V, et al. Is synchronised NIPPV more effective than NIPPV  
23 and NCPAP in treating apnoea of prematurity (AOP)? A randomised cross-over trial. *Arch*  
24 *Dis Child Fetal Neonatal Ed.* 2015 Jan;100(1):F17-23.  
25  
26  
27  
28  
29  
30 26. Zhu X-W, Zhao J-N, Tang S-F, et al. Noninvasive high-frequency oscillatory ventilation  
31 versus nasal continuous positive airway pressure in preterm infants with moderate-severe  
32 respiratory distress syndrome: A preliminary report. *Pediatr Pulmonol.* 2017;1-5.  
33  
34  
35  
36  
37  
38  
39  
40  
41  
42  
43  
44  
45  
46  
47  
48  
49  
50  
51  
52  
53  
54  
55  
56  
57  
58  
59  
60

**Table 1** Patient and maternal demographics, neonatal characteristics at the time of extubation.

|                                                    | <b>All infants<br/>n 108</b> | <b>Extubation Success Group<br/>n 90 (83%)</b> | <b>Extubation Failure Group<br/>n 18 (17%)</b> | <b>p</b>    |
|----------------------------------------------------|------------------------------|------------------------------------------------|------------------------------------------------|-------------|
| Gestational Age, wks                               | 26.2 ± 1.4                   | 26.3 ± 1.3                                     | 25.5 ± 1.4                                     | <b>0.02</b> |
| Birth Weight, g                                    | 742 ± 166                    | 750 ± 168                                      | 703 ± 159                                      | 0.29        |
| Complete course of Antenatal Steroids <sup>a</sup> | 50 (46)                      | 42 (47)                                        | 8 (44)                                         | 1           |
| 5-min Apgar Score                                  | 8 [2-9]                      | 7 [2-9]                                        | 8 [4-9]                                        | 0.50        |
| SGA                                                | 31 (29)                      | 27 (30)                                        | 4 (22)                                         | 0.58        |
| Male                                               | 47 (44)                      | 35 (39)                                        | 12 (67)                                        | <b>0.04</b> |
| Premature Rupture of Membranes >12 h               | 38 (35)                      | 29 (32)                                        | 9 (50)                                         | 0.18        |
| Delivery by caesarean section                      | 82 (76)                      | 69 (77)                                        | 13 (72)                                        | 0.76        |
| Extubation weight g                                | 739 ± 149                    | 741 ± 154                                      | 732 ± 142                                      | 0.82        |
| Extubation attempt d                               | 4 [1-53]                     | 4 [1-52]                                       | 5 [1-19]                                       | 0.95        |

Values expressed as mean ± SD, median [range] and number (percent). <sup>a</sup> A complete course of antenatal steroids was defined as two doses of betamethasone administered more than 24 hours but no more than 7 days before delivery; SGA: small for gestational age.

**Table 2** Ventilator settings, ventilation and transcutaneous blood gas values at baseline, pre-surfactant and at extubation time.

|                                                        | <b>Extubation<br/>Success<br/>Group</b> | <b>Extubation<br/>Failure<br/>Group</b> | <b>p</b>         |
|--------------------------------------------------------|-----------------------------------------|-----------------------------------------|------------------|
| <b>Baseline</b>                                        |                                         |                                         |                  |
| MAP (cmH <sub>2</sub> O)                               | 10.2 ± 1.1                              | 10.2 ± 1.0                              | 0.94             |
| FiO <sub>2</sub>                                       | 0.40 ± 0.17                             | 0.48 ± 0.24                             | 0.08             |
| Amplitude (%)                                          | 59 ± 33                                 | 56 ± 32                                 | 0.72             |
| Frequency (Hz)                                         | 9.6 ± 1.0                               | 9.7 ± 0.8                               | 0.69             |
| V <sub>T</sub> (ml/kg)                                 | 1.6 ± 0.6                               | 1.5 ± 0.5                               | 0.51             |
| DCO <sub>2</sub> (ml <sup>2</sup> /kg <sup>2</sup> /s) | 25 ± 15                                 | 25 ± 10                                 | 1                |
| TcPO <sub>2</sub> (mmHg)                               | 53 ± 12                                 | 50 ± 8                                  | 0.31             |
| TcPCO <sub>2</sub> (mmHg)                              | 52 ± 8                                  | 54 ± 4                                  | 0.30             |
| <b>Pre-surfactant</b>                                  |                                         |                                         |                  |
| MAP (cmH <sub>2</sub> O)                               | 13.1 ± 1.6                              | 11.9 ± 2.4                              | <b>0.02</b>      |
| FiO <sub>2</sub>                                       | 0.25 ± 0.01                             | 0.33 ± 0.08                             | <b>&lt;0.001</b> |
| Amplitude (%)                                          | 76 ± 30                                 | 62 ± 31                                 | 0.08             |
| Frequency (Hz)                                         | 9.3 ± 1.0                               | 9.6 ± 0.9                               | 0.30             |
| V <sub>T</sub> (ml/kg)                                 | 1.9 ± 0.6                               | 1.8 ± 0.4                               | 0.52             |
| DCO <sub>2</sub> (ml <sup>2</sup> /kg <sup>2</sup> /s) | 29 ± 15                                 | 29 ± 10                                 | 1                |
| TcPO <sub>2</sub> (mmHg)                               | 59 ± 16                                 | 54 ± 11                                 | 0.23             |
| TcPCO <sub>2</sub> (mmHg)                              | 46 ± 9                                  | 50 ± 4                                  | 0.08             |
| <b>Extubation</b>                                      |                                         |                                         |                  |
| MAP (cmH <sub>2</sub> O)                               | 6.1 ± 0.9                               | 6.1 ± 1.2                               | 0.97             |
| FiO <sub>2</sub>                                       | 0.22 ± 0.03                             | 0.23 ± 0.02                             | 0.30             |
| Amplitude (%)                                          | 43 ± 24                                 | 39 ± 12                                 | 0.46             |
| Frequency (Hz)                                         | 9.3 ± 1.2                               | 9.3 ± 0.7                               | 0.88             |
| V <sub>T</sub> (ml/kg)                                 | 2.1 ± 0.6                               | 1.9 ± 0.6                               | 0.28             |
| DCO <sub>2</sub> (ml <sup>2</sup> /kg <sup>2</sup> /s) | 34 ± 11                                 | 35 ± 15                                 | 0.70             |
| TcPO <sub>2</sub> (mmHg)                               | 56 ± 5                                  | 54 ± 3                                  | 0.08             |
| TcPCO <sub>2</sub> (mmHg)                              | 48 ± 3                                  | 49 ± 2                                  | 0.18             |

Values expressed as mean ± SD; MAP: mean airways pressure. TcPO<sub>2</sub>: transcutaneous partial pressure of O<sub>2</sub>; TcPCO<sub>2</sub>: transcutaneous partial pressure of CO<sub>2</sub>; V<sub>T</sub>: Tidal Volume HFOV; DCO<sub>2</sub>: coefficient of gas transport.

**Table 3** Mortality and respiratory outcomes.

|                        | <b>Extubation<br/>Success<br/>Group</b> | <b>Extubation<br/>Failure<br/>Group</b> | <b>p</b>     |
|------------------------|-----------------------------------------|-----------------------------------------|--------------|
| Mortality              | 11(12)                                  | 1(5)                                    | 0.68         |
| > 1 dose of surfactant | 19 (21)                                 | 10 (56)                                 | <b>0.006</b> |
| Total ventilator h     | 195 [7-3281]                            | 389 [12-2016]                           | <b>0.02</b>  |
| Total oxygen h         | 741 [1-4796]                            | 987 [10-4622]                           | 0.18         |
| BPD*                   | 16/79 (20)                              | 6/17 (35)                               | 0.20         |

Values expressed as median [range] and number (percent). BPD: bronchopulmonary dysplasia.

\*Data are referred to >36 weeks postmenstrual age survivors babies only.

**Table 4.** Risks factors for Extubation Outcome: multivariable analysis

| <b>Extubation Success Group</b>                | <b>OR</b> | <b>95% CI</b> | <b>p</b>    |
|------------------------------------------------|-----------|---------------|-------------|
| Gestational Age (weeks)                        | 1.71      | 1.04, 2.08    | <b>0.03</b> |
| Male                                           | 3.08      | 0.85, 11.2    | 0.09        |
| MAP (cmH <sub>2</sub> O) <i>pre-surfactant</i> | 1.51      | 1.06, 2.15    | <b>0.02</b> |
| FiO <sub>2</sub> <i>pre-surfactant</i>         | 0.06      | 0.00, 1.57    | 0.09        |
| > 1 dose of surfactant                         | 0.31      | 0.09, 1.16    | 0.08        |

FiO<sub>2</sub>: fraction of inspired oxygen; MAP: mean airways pressure.

# BMJ Paediatrics Open

## Extubation from high-frequency oscillatory ventilation in extremely low birth weight infants: a prospective observational study

|                               |                                                                                                                                                                                                                                                                                                                                                                                                                                                                                                                                                                                                                                                                                                                                                                                                                                                                                                                                                                                                                                                                                                                                                                                                                                                                                                                                                                                                                                                                                                                                                                                                                                                                                                                                                                                                                                                                                                                                                                                                                                                                                                                                                                                                                                                                                                                                                                                                                                                                                                                                                               |
|-------------------------------|---------------------------------------------------------------------------------------------------------------------------------------------------------------------------------------------------------------------------------------------------------------------------------------------------------------------------------------------------------------------------------------------------------------------------------------------------------------------------------------------------------------------------------------------------------------------------------------------------------------------------------------------------------------------------------------------------------------------------------------------------------------------------------------------------------------------------------------------------------------------------------------------------------------------------------------------------------------------------------------------------------------------------------------------------------------------------------------------------------------------------------------------------------------------------------------------------------------------------------------------------------------------------------------------------------------------------------------------------------------------------------------------------------------------------------------------------------------------------------------------------------------------------------------------------------------------------------------------------------------------------------------------------------------------------------------------------------------------------------------------------------------------------------------------------------------------------------------------------------------------------------------------------------------------------------------------------------------------------------------------------------------------------------------------------------------------------------------------------------------------------------------------------------------------------------------------------------------------------------------------------------------------------------------------------------------------------------------------------------------------------------------------------------------------------------------------------------------------------------------------------------------------------------------------------------------|
| Journal:                      | <i>BMJ Paediatrics Open</i>                                                                                                                                                                                                                                                                                                                                                                                                                                                                                                                                                                                                                                                                                                                                                                                                                                                                                                                                                                                                                                                                                                                                                                                                                                                                                                                                                                                                                                                                                                                                                                                                                                                                                                                                                                                                                                                                                                                                                                                                                                                                                                                                                                                                                                                                                                                                                                                                                                                                                                                                   |
| Manuscript ID                 | bmjpo-2018-000350.R1                                                                                                                                                                                                                                                                                                                                                                                                                                                                                                                                                                                                                                                                                                                                                                                                                                                                                                                                                                                                                                                                                                                                                                                                                                                                                                                                                                                                                                                                                                                                                                                                                                                                                                                                                                                                                                                                                                                                                                                                                                                                                                                                                                                                                                                                                                                                                                                                                                                                                                                                          |
| Article Type:                 | Original article                                                                                                                                                                                                                                                                                                                                                                                                                                                                                                                                                                                                                                                                                                                                                                                                                                                                                                                                                                                                                                                                                                                                                                                                                                                                                                                                                                                                                                                                                                                                                                                                                                                                                                                                                                                                                                                                                                                                                                                                                                                                                                                                                                                                                                                                                                                                                                                                                                                                                                                                              |
| Date Submitted by the Author: | 08-Sep-2018                                                                                                                                                                                                                                                                                                                                                                                                                                                                                                                                                                                                                                                                                                                                                                                                                                                                                                                                                                                                                                                                                                                                                                                                                                                                                                                                                                                                                                                                                                                                                                                                                                                                                                                                                                                                                                                                                                                                                                                                                                                                                                                                                                                                                                                                                                                                                                                                                                                                                                                                                   |
| Complete List of Authors:     | <p>Tana, Milena; Unità Operativa Complessa di Neonatologia, Area Salute del bambino, Dipartimento di Scienza della Salute della Donna e del Bambino. Fondazione Policlinico Universitario A. Gemelli IRCCS, Roma.</p> <p>Lio, Alessandra; Unità Operativa Complessa di Neonatologia, Area Salute del bambino, Dipartimento di Scienza della Salute della Donna e del Bambino. Fondazione Policlinico Universitario A. Gemelli IRCCS, Roma.</p> <p>Tirone, Chiara; Unità Operativa Complessa di Neonatologia, Area Salute del bambino, Dipartimento di Scienza della Salute della Donna e del Bambino. Fondazione Policlinico Universitario A. Gemelli IRCCS, Roma.</p> <p>Aurilia, Claudia; Unità Operativa Complessa di Neonatologia, Area Salute del bambino, Dipartimento di Scienza della Salute della Donna e del Bambino. Fondazione Policlinico Universitario A. Gemelli IRCCS, Roma.</p> <p>Tiberi, Eloisa; Unità Operativa Complessa di Neonatologia, Area Salute del bambino, Dipartimento di Scienza della Salute della Donna e del Bambino. Fondazione Policlinico Universitario A. Gemelli IRCCS, Roma.</p> <p>Serrao, Francesca; Unità Operativa Complessa di Neonatologia, Area Salute del bambino, Dipartimento di Scienza della Salute della Donna e del Bambino. Fondazione Policlinico Universitario A. Gemelli IRCCS, Roma.</p> <p>Purcaro, Velia; Unità Operativa Complessa di Neonatologia, Area Salute del bambino, Dipartimento di Scienza della Salute della Donna e del Bambino. Fondazione Policlinico Universitario A. Gemelli IRCCS, Roma.</p> <p>Corsello, Mirta; Unità Operativa Complessa di Neonatologia, Area Salute del bambino, Dipartimento di Scienza della Salute della Donna e del Bambino. Fondazione Policlinico Universitario A. Gemelli IRCCS, Roma</p> <p>Catenazzi, Piero; Unità Operativa Complessa di Neonatologia, Area Salute del bambino, Dipartimento di Scienza della Salute della Donna e del Bambino. Fondazione Policlinico Universitario A. Gemelli IRCCS, Roma</p> <p>D'Andrea, Vito; Unità Operativa Complessa di Neonatologia, Area Salute del bambino, Dipartimento di Scienza della Salute della Donna e del Bambino. Fondazione Policlinico Universitario A. Gemelli IRCCS, Roma</p> <p>Barone, Giovanni; Unità Operativa Complessa di Neonatologia, Area Salute del bambino, Dipartimento di Scienza della Salute della Donna e del Bambino. Fondazione Policlinico Universitario A. Gemelli IRCCS, Roma</p> <p>Ricci, Cinzia; Unità Operativa Complessa di Neonatologia, Area Salute del</p> |

1  
2  
3  
4  
5  
6  
7  
8  
9  
10  
11  
12  
13  
14  
15  
16  
17  
18  
19  
20  
21  
22  
23  
24  
25  
26  
27  
28  
29  
30  
31  
32  
33  
34  
35  
36  
37  
38  
39  
40  
41  
42  
43  
44  
45  
46  
47  
48  
49  
50  
51  
52  
53  
54  
55  
56  
57  
58  
59  
60

|           |                                                                                                                                                                                                                                                                                                                                                                                                                                                                                                         |
|-----------|---------------------------------------------------------------------------------------------------------------------------------------------------------------------------------------------------------------------------------------------------------------------------------------------------------------------------------------------------------------------------------------------------------------------------------------------------------------------------------------------------------|
|           | bambino, Dipartimento di Scienza della Salute della Donna e del Bambino. Fondazione Policlinico Universitario A. Gemelli IRCCS, Roma Pastorino, Roberta; Università Cattolica del Sacro Cuore ; Section of Hygiene, Institute of Public Health, Vento, Giovanni; Unità Operativa Complessa di Neonatologia, Area Salute del bambino, Dipartimento di Scienza della Salute della Donna e del Bambino. Fondazione Policlinico Universitario A. Gemelli IRCCS, Roma - Università Cattolica del Sacro Cuore |
| Keywords: | Neonatology                                                                                                                                                                                                                                                                                                                                                                                                                                                                                             |
|           |                                                                                                                                                                                                                                                                                                                                                                                                                                                                                                         |

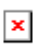



1  
2  
3 **Extubation from high-frequency oscillatory ventilation in extremely low birth weight infants:**  
4 **a prospective observational study**  
5  
6

7 Milena Tana<sup>1</sup>, Alessandra Lio<sup>1</sup>, Chiara Tirone<sup>1</sup>, Claudia Aurilia<sup>1</sup>, Eloisa Tiberi<sup>1</sup>, Francesca Serrao<sup>1</sup>,  
8 Velia Purcaro<sup>1</sup>, Mirta Corsello<sup>1</sup>, Piero Catenazzi<sup>1</sup>, Vito D'Andrea<sup>1</sup>, Giovanni Barone<sup>1</sup>, Cinzia  
9 Ricci<sup>1</sup>, Roberta Pastorino<sup>2</sup>, Giovanni Vento<sup>3</sup>  
10

11 <sup>1</sup>Unità Operativa Complessa di Neonatologia, Area Salute del bambino, Dipartimento di Scienza  
12 della Salute della Donna e del Bambino. Fondazione Policlinico Universitario A. Gemelli IRCCS,  
13 Roma.  
14

15 <sup>2</sup>Section of Hygiene, Institute of Public Health, Università Cattolica del Sacro Cuore, Largo  
16 Francesco Vito 1, 00168 Rome, Italy.  
17

18 <sup>3</sup>Unità Operativa Complessa di Neonatologia, Area Salute del bambino, Dipartimento di Scienza  
19 della Salute della Donna e del Bambino. Fondazione Policlinico Universitario A. Gemelli IRCCS,  
20 Roma - Università Cattolica del Sacro Cuore  
21

22  
23  
24  
25  
26 **E-mail addresses:**

27 Milena Tana: [milenatana@yahoo.it](mailto:milenatana@yahoo.it)

28 Alessandra Lio: [alelio@hotmail.it](mailto:alelio@hotmail.it)

29 Chiara Tirone: [chiaratirone@tiscali.it](mailto:chiaratirone@tiscali.it)

30 Claudia Aurilia: [claudiaurilia@hotmail.it](mailto:claudiaurilia@hotmail.it)

31 Eloisa Tiberi: [eloisatiberi@yahoo.it](mailto:eloisatiberi@yahoo.it)

32 Francesca Serrao: [francesca.serrao@yahoo.it](mailto:francesca.serrao@yahoo.it)

33 Velia Purcaro: [veliapurcaro@yahoo.it](mailto:veliapurcaro@yahoo.it)

34 Mirta Corsello: [mirtacors@hotmail.it](mailto:mirtacors@hotmail.it)

35 Piero Catenazzi: [piero.catenazzi@gmail.com](mailto:piero.catenazzi@gmail.com)

36 Vito D'Andrea: [dandrea.vito@gmail.com](mailto:dandrea.vito@gmail.com)

37 Giovanni Barone: [gbarone85@yahoo.it](mailto:gbarone85@yahoo.it)

38 Cinzia Ricci: [cinziar87@hotmail.it](mailto:cinziar87@hotmail.it)

39 Roberta Pastorino: [roberta.pastorino@unicatt.it](mailto:roberta.pastorino@unicatt.it)

40 Giovanni Vento: [giovanni.vento@unicatt.it](mailto:giovanni.vento@unicatt.it)

41  
42  
43  
44 **Address correspondence to:** Giovanni Vento, Unità Operativa Complessa di Neonatologia, Area  
45 Salute del bambino, Dipartimento di Scienza della Salute della Donna e del Bambino. Fondazione  
46 Policlinico Universitario A. Gemelli IRCCS, Roma - Università Cattolica del Sacro Cuore.

47 Largo A. Gemelli, 8 00168 Rome, Italy [[giovanni.vento@unicatt.it](mailto:giovanni.vento@unicatt.it)], Phone ++39-06-30154357;  
48 Fax ++39-06-338321  
49

**Abstract**

**Objective:** To evaluate if weaning from high frequency oscillatory ventilation (HFOV) directly to a non-invasive mode of respiratory support is feasible and results in successful extubation in extremely low birth weight (ELBW) infants.

**Design:** Prospective observational study.

**Setting:** Tertiary neonatal intensive care unit.

**Patients:** One hundred and eight ELBW infants of  $26.2 \pm 1.4$  weeks of gestational age directly extubated from HFOV.

**Interventions:** All infants were managed with elective HFOV and received surfactant after a recruitment HFOV maneuver. Extubation was attempted at mean airways pressure (MAP)  $\leq 6$  cmH<sub>2</sub>O with FiO<sub>2</sub>  $\leq 0.25$ . After extubation, all infants were supported by nasal CPAP (6-8 cm H<sub>2</sub>O).

**Main outcome measures:** Extubation failure (clinical deterioration requiring re-intubation) was defined as shorter than 7 days.

**Results:** Ninety patients (83%) were successfully extubated and 18 (17%) required re-intubation. No significant differences were found between the two groups in terms of birth weight, day of life and weight at the time of extubation. Multivariable analysis showed that gestational age (OR 1.71; 95% CI 1.04, 2.08) and higher MAP prior to surfactant (OR 1.51; 95% CI 1.06, 2.15) were associated with successful extubation.

**Conclusions:** In ELBW infants direct extubation from HFOV at MAP  $\leq 6$  cm H<sub>2</sub>O with FiO<sub>2</sub>  $\leq 0.25$  is feasible. Our extubation success rate (83%) is higher than conventional mechanical ventilation in this very vulnerable class of infants.

**Key words:** HFOV, Extubation criteria, ELBW infants, Respiratory distress syndrome, Mean airway pressure

## Introduction

Despite the increased use of non-invasive respiratory support, mechanical ventilation may be life-saving in preterm infants with respiratory failure, especially in extremely low birth weight (ELBW) infants (birth weight < 1000 g) (1, 2). A prolonged endotracheal intubation is associated with risks and complications, including bronchopulmonary dysplasia (BPD) (1-6), therefore clinicians should wean and extubate ELBW infants as soon as possible (7). Several studies tried to find the optimal timing of extubation of preterm infants treated with conventional mechanical ventilation (CMV) (8-14). In these studies, success of extubation in ELBW infants ranged from 52% to 73% (8, 14), and this is why extubation failure remains a major problem. In the last years, high-frequency oscillatory ventilation (HFOV) has been increasingly used in preterm infants with respiratory failure, because early HFOV could reduce risk of BPD (15), especially if associated with an open lung strategy (16,17). Despite that, data on weaning and extubation criteria are limited, especially in ELBW infants. Some clinicians are more comfortable in switching from HFOV to CMV to wean and extubate the infants (18), but this combined strategy could reduce the efficacy of HFOV alone to decrease the incidence of BPD (19). Direct extubation from HFOV is possible and may even be desirable (7, 16). Van Velzen et al. showed that weaning the mean airways pressure (MAP) below 8 cmH<sub>2</sub>O with a fraction of inspired oxygen (FiO<sub>2</sub>) below 0.30 is feasible during open lung HFOV and direct extubation at these settings is successful in 90% of preterm infants < 37 weeks of gestational age (GA). However, the success rate dropped to 81% in 68 ELBW studied infants (20). Compared to the experience of van Velzen et al., our study is aimed at: the extubation process from HFOV in ELBW infants only (i.e. the population at greater risk of ventilator-induced lung injury); evaluating the success or failure of the extubation attempt over a longer period of time (7 days instead of 48 hours after extubation); and the safety of lower pre-extubation MAP values ( $\leq$  6 cm H<sub>2</sub>O instead of 8 cm H<sub>2</sub>O) as the most appropriate ventilatory set for ELBW neonates. The aim of the present study is therefore to evaluate in a cohort of ELBW infants treated with elective open lung

HFOV if  $\text{MAP} \leq 6 \text{ cm H}_2\text{O}$  and  $\text{FiO}_2 \leq 0.25$  are feasible and successfully associated with direct HFOV extubation during a 7-day observation window, as longer periods may be needed to adequately capture this outcome in ELBW infants (13, 14).

## Methods

### Patients

This study was approved by the Ethics Committee of the Department of Pediatrics of Fondazione Policlinico Universitario A. Gemelli IRCCS, Roma - Università Cattolica del Sacro Cuore, which waived the need for parental consent. Between June 2011 and June 2014, inborn ELBW infants were included in this prospective observational study if they met the following conditions: a diagnosis of respiratory distress syndrome (RDS), requiring endotracheal intubation at birth or failing nasal continuous positive airway pressure (CPAP) within 24 hours of life; electively HFOV ventilated and receiving surfactant treatment; and directly extubated from HFOV.

### HFOV strategy

HFOV is actually the elective modality of ventilation in preterm newborns with  $\text{GA} \leq 27$  weeks and/or ELBW infants in our NICU, as a result of our previous randomized controlled trial comparing the effects of HFOV vs CMV (21). HFOV was delivered by a Dräger Babylog 8000 *plus* ventilator (Dräger, Lubeck, Germany) with an “optimum lung volume strategy“ prior to surfactant administration, recruiting collapsed alveoli using oxygenation with a  $\text{FiO}_2$  target  $\leq 0.25$  as an indirect parameter for lung volume (17).

Ventilation was started at a MAP of  $10 \text{ cmH}_2\text{O}$ , a frequency of 10 Hz, and an amplitude of 30%, increased if necessary until the infant’s chest was seen to be visibly vibrating . The  $\text{FiO}_2$  was initially set to ensure adequate oxygen saturation ( $\text{SpO}_2$  90-95%). If the  $\text{FiO}_2$  was  $> 0.25$ , the MAP was increased by 1-2  $\text{cmH}_2\text{O}$  every 2-5 minutes until  $\text{FiO}_2$  reached  $\leq 0.25$ . The recruitment was stopped if oxygenation no longer improved or there were signs of lung hyperinflation (capillary refill time  $> 3$  seconds and/or hypotension). This approach provides a more effective means to recruit and protect

1  
2  
3 acutely injured lungs (17). Surfactant was administered at the end of the recruitment procedure.  
4  
5 Transcutaneous partial pressure of CO<sub>2</sub> (TcPCO<sub>2</sub>) and/or PaCO<sub>2</sub> were managed by adjustment of  
6  
7 the oscillatory amplitude and then of the frequency. The goals of respiratory management were to  
8  
9 maintain blood gas values of: pH 7.30-7.45, PaCO<sub>2</sub> and/or TcPCO<sub>2</sub> 45-55 mm Hg, PaO<sub>2</sub> and/or  
10  
11 transcutaneous partial pressure of O<sub>2</sub> (TcPO<sub>2</sub>) 50-70 mm Hg and SpO<sub>2</sub> 90-95%. All patients re-  
12  
13 ceived a loading dose of caffeine (20 mg/kg) immediately after admission to the NICU, then  
14  
15 maintenance therapy (22) and Remifentanyl by continuous intravenous infusion at a dose of 0.075  
16  
17 µg/kg/min to provide analgesia during HFOV while preserving spontaneous respiratory activity  
18  
19 (23). Doxapram was not used during the study period as per our departmental protocols.  
20  
21

### 22 **Weaning and extubation criteria**

23  
24 HFOV ventilation was managed to ensure to patients the lowest possible MAP, amplitude and FiO<sub>2</sub>  
25  
26 in order to minimize ventilator-induced lung injury. Reduction in MAP was gradually accomplished  
27  
28 following oxygenation and lung expansion estimated by chest radiographs. FiO<sub>2</sub> was adjusted to  
29  
30 maintain adequate oxygenation. Reduction of amplitude was gradually accomplished following  
31  
32 TcPCO<sub>2</sub> and/or PaCO<sub>2</sub> values. Extubation was attempted when the neonate's condition remained  
33  
34 stable for at least 6 hours, receiving ventilation with MAP ≤ 6 cm H<sub>2</sub>O and FiO<sub>2</sub> ≤ 0.25. At that  
35  
36 point in time a FiO<sub>2</sub> > 0.25 and ≤ 0.30 was acceptable, to ensure that the extubation was not delayed  
37  
38 by small fluctuations in oxygen need.  
39  
40

41  
42 After extubation all the patients were supported by nasal CPAP at 6-8 cmH<sub>2</sub>O using short binasal  
43  
44 prongs of appropriate size while nasal ventilation was not administered. Extubation failure was de-  
45  
46 fined as clinical deterioration requiring re-intubation during the following 7 days (13,14). All data  
47  
48 refer only to the first extubation attempt in the studied neonates.  
49

50  
51 The indications for reintubation were: a) repeated episodes of apnea defined as >4 episodes of ap-  
52  
53 nea per hour (or >2 episodes of apnea per hour when ventilation with bag and mask was required);  
54  
55 b) hypoxia defined as FiO<sub>2</sub> > 0.50 to maintain SpO<sub>2</sub> 90-95% for more than 2 hours despite 8 cm  
56  
57  
58  
59  
60

1  
2  
3 H<sub>2</sub>O of CPAP; c) development of respiratory acidosis indicated by 2 consecutive blood gases with  
4  
5 PaCO<sub>2</sub> ≥65 mm Hg and pH < 7.20.

### 6 7 **Data collection**

8  
9 Demographic data on patient and maternal characteristics were collected from each patient. Data  
10 were collected on MAP, FiO<sub>2</sub>, amplitude, frequency, DCO<sub>2</sub>, Tidal Volume HFOV (V<sub>T</sub>), TcPO<sub>2</sub>,  
11  
12 TcPCO<sub>2</sub> at start of ventilation and at the time of extubation attempt. Finally, data on MAP and FiO<sub>2</sub>  
13  
14 were collected at the end of HFOV recruitment procedure, immediately prior to surfactant  
15  
16 administration. The number of patients failing extubation was collected, including the main reason  
17  
18 for failure and the time of re-intubation. Weight and day of life at extubation, duration of  
19  
20 mechanical ventilation and O<sub>2</sub>-therapy during the hospital stay, requirement of additional doses of  
21  
22 surfactant and development of BPD (O<sub>2</sub>-dependence at 36 weeks of postmenstrual age) were also  
23  
24 reported for each patient.  
25  
26  
27

### 28 29 **Statistical analysis**

30  
31 Values were expressed as mean and SD or median and range for continuous variables or absolute  
32  
33 frequency and percentages for categorical variables. Continuous variables were compared with par-  
34  
35 ametric (Student's t test) or non-parametric (Mann Whitney U test) tests as appropriate. Categorical  
36  
37 variables were compared by using a two-tailed Fisher's exact test. A 2-tailed value of p<0.05 was  
38  
39 considered significant. Data were analysed using commercial statistical software (Graphpad Prism  
40  
41 V.5.0a; Chicago, Illinois, USA).  
42  
43

44  
45 In order to evaluate the association between the successful extubation and each explanatory varia-  
46  
47 ble, a univariable analysis was performed using a logistic regression model by including one varia-  
48  
49 ble at a time. The independent variables found to be significant in the univariable analyses (p value  
50  
51 ≤ 0.05) were included in the multivariable model. A likelihood ratio test was used to compare the  
52  
53 suitability of the models and to select the most appropriate model. Statistical analyses were done  
54  
55 with Stata version 2013 software (Stata Statistical Software: Release 13, College Station, Texas,  
56  
57 USA).  
58  
59  
60

## Results

During the study period, 108 ELBW infants with RDS required elective HFOV within 24 hours of life and were directly extubated from HFOV (Figure 1). Extubation was attempted at a median [range] age of 4 [1-53] days (Table 1). All the comparisons were made between newborns successfully extubated (Extubation Success Group) and newborns failing the extubation attempt (Extubation Failure Group). The percentage of newborns successfully extubated was 83%. The only significant differences between the two groups were the higher percentage of males in the neonates who failed extubation and their lower GA (Table 1). If we limit the time of extubation to the first week of life, the same percentage of successful extubation was reached (66 out of 80 patients - 83% -, data not shown).

Thirteen infants failed extubation within 72 hours and were reintubated at a median [range] time of 24 [2-48] hours for hypoxia (n 3), hypercapnia (n 5) and apnea (n 5). Another five newborns who failed extubation after 72 hours and within 7 days were reintubated at a median [range] time of 120 [96-160] hours for hypoxia (n 3), and apnea (n 2). Of the 18 infants who met failure criteria within 7 days after extubation: 7 (39%) failed due to apnea; 6 (33%) due to hypoxia; and 5 (28%) due to hypercapnia. No newborn who failed extubation had an episode of suspected or confirmed sepsis during the 7-day period after extubation.

Regarding to the ventilator setting at the baseline, no significant differences were observed between the two groups (Table 2). Prior to surfactant administration, the neonates of the Extubation Success Group received ventilation with a significantly higher MAP and lower FiO<sub>2</sub> (p = 0.02 and p<0.001 respectively) in comparison to the newborns of the Extubation Failure Group (Table 2). At extuba-

tion, there were no differences in MAP, FiO<sub>2</sub>, amplitude, or frequency between infants who were successfully extubated and those who failed extubation (Table 2).

Finally, the neonates of Extubation Failure Group required treatment with additional doses of surfactant more frequently than infants of Extubation Success Group (p=0.006) and received a significantly longer period of mechanical ventilation (p=0.02) (Table 3). Although the neonates of the Extubation Failure Group had a higher percentage of BPD, the difference was not statistically significant (Table 3).

Multivariable analysis showed that GA (OR 1.71; 95% CI 1.04, 2.08) and higher MAP prior to surfactant (OR 1.51; 95% CI 1.06, 2.15) were associated with successful extubation (Table 4).

## Discussion

In comparison to the only experience reported on the successful extubation rates directly from HFOV by van Velzen et al (20), referring to a heterogeneous population of 214 preterm infants and including only 68 neonates with a birth weight  $\leq 1000$  g, our report provides more detailed data on the extubation process during HFOV in a large cohort of ELBW infants. Moreover, our study evaluated the success or failure of the extubation attempt over a longer period of time (within 7 days), compared to the usually shorter time windows ( $\leq 48$  or  $\leq 72$  hours after extubation). This is particularly important, considering the recent remarks by Giaccone et al. (13), which showed that in studies predominately enrolling ELBW infants, rates of extubation success were negatively associated with the duration of observation. By relying on shorter windows of observation, studies enrolling a larger proportion of small infants may therefore underestimate the true rate of reintubation. In fact, the reintubation rate did not appear to plateau even after a week of observation, indicating that longer periods may be necessary to adequately capture this outcome in ELBW infants (13).

In our experience, neonates of the Extubation Failure Group prior to surfactant administration received ventilation with a significantly lower MAP (p<0.05) and a significantly higher FiO<sub>2</sub> (p<0.001) in comparison respect to the newborns of the Extubation Success Group (Table 2). A



1  
2  
3 lower MAP prior surfactant was confirmed by multivariable analysis as an independent risk factor  
4 for extubation failure (Table 2 e 4). This occurred despite our protocol of optimal lung volume  
5 strategy aiming to fully recruit the lung before surfactant therapy, increasing step-by-step MAP un-  
6 til the target  $\text{FiO}_2$  of 0.25 had been reached: in case of the neonates who failed extubation, surfac-  
7 tant had been administered before achieving optimal lung recruitment. Even though they were af-  
8 fected by a more severe RDS, as demonstrated by the higher baseline  $\text{FiO}_2$  in comparison to the ne-  
9 onates who experienced successful extubation, the importance of fully recruiting the lung before  
10 surfactant administration should be taken into account, because of the significant association of op-  
11 timal lung volume strategy with better respiratory outcomes (17). Neonates of the Extubation Fail-  
12 ure Group received in fact more frequently additional surfactant doses (Table 3).

24 When compared to the only study reporting the feasibility of weaning and direct extubation from  
25 HFOV in ELBW infants (20), our data showed similar rates of successful extubation: 88% within  
26 72 hours and 83% within 7 days after the extubation attempt, vs 81% within 48 hours only, respec-  
27 tively. More importantly, our rates of extubation failure are lower than those recently reported by  
28 Giaccone et al. in a recent systematic review on the definition of extubation success in very prema-  
29 ture infants (13). In the multivariable linear regression analysis, median subject's birth weight  
30  $\leq 1000$  g was found to be an effect modifier ( $p=0.03$ ) in the association between duration of post-  
31 extubation observation and rate of reintubation. After stratifying the analysis for this variable, the  
32 authors found that in studies of infants with median birth weight  $\leq 1000$  g, the reintubation rate in-  
33 creased significantly with longer duration of observation ( $p=0.001$ ). In particular, the mean reintu-  
34 bation rate in the newborns with median birth weight  $\leq 1000$  g increased from 25% at 72 hours to  
35 35% at 168 hours, with the latter result being more than double of that reported in our experience  
36 (17%). It is however necessary to keep in mind that by prolonging the observation period, the  
37 chances of reintubation for a different cause of respiratory failure (i.e. sepsis) increase. In our expe-  
38 rience, no newborn who failed extubation had an episode of suspected or confirmed sepsis during  
39 the 7-day period after extubation.

1  
2  
3 In our study, the neonates failing extubation had significantly lower GA compared with infants suc-  
4 cessfully extubated, with the lower GA being an independent risk factor for extubation failure in the  
5 multivariable analysis (Table 1 e 4). Apnea was the main reason for reintubation (39% of cases)  
6 stressing the important role of the central inspiratory drive in determining the premature infant's  
7 ability to maintain adequate, independent ventilation. The use of other non-invasive respiratory  
8 support, alternatives to CPAP alone in the post-extubation period (i.e. nasal intermittent mandatory  
9 ventilation and/or bilevel CPAP), might be a better strategy to overcome this problem. Recently  
10 Buzzella et al showed that in preterm infants with residual lung disease nasal CPAP in the range of  
11 7-9 cmH<sub>2</sub>O it was more effective in reducing extubation failure than a range of 4-6 cmH<sub>2</sub>O (24).  
12 These findings suggest: the need for higher distending pressure post-extubation to obtain better ox-  
13 ygenation with a more stable lung volume and reduced pulmonary shunt in the more immature in-  
14 fants who are still oxygen-dependent; the improved oxygenation and lung volume stability may  
15 have also attenuated central and obstructive apnea (24). Hypoxia and hypercapnia accounted for  
16 most of extubation failure attempts after the first 24 hours (8 out of 13, 61%): a recruitment maneu-  
17 ver to try to adequately open the lung could play an important role in preventing extubation failure,  
18 as suggested by the results of multivariable analysis. Importantly, we used MAP  $\leq$  6 cmH<sub>2</sub>O and  
19 FiO<sub>2</sub>  $\leq$  0.25 as criteria to attempt extubation. Using these lower setting in comparison to those  
20 adopted by van Velzen (20) may improve the success rate of extubation but it may also prolong the  
21 time on the ventilator. Future studies could evaluate if extubation at higher HFOV settings in  
22 ELBW infants could results in similar rates of extubation failure while reducing the ventilation  
23 time.

24  
25  
26  
27  
28  
29  
30  
31  
32  
33  
34  
35  
36  
37  
38  
39  
40  
41  
42  
43  
44  
45  
46  
47  
48 Although our study suggests that direct extubation from HFOV is feasible in ELBW infants, there  
49 are some limitations and important questions that remain to be answered. First of all, the small  
50 number of ELBW infants failing extubation could limit the power to detect differences between  
51 groups and might have affected the accuracy of our estimates. Moreover, higher level of CPAP  
52 post-extubation (7-9 cm H<sub>2</sub>O) or other non-invasive respiratory support, such as synchronized nasal  
53  
54  
55  
56  
57  
58  
59  
60

1  
2  
3 IPPV (25) or nasal HFOV (26), could be used to improve the success rate of extubation in ELBW  
4  
5 infants.

6  
7 Finally, our study population included newborns extubated early ( $\leq 7$  days of life) and newborns  
8  
9 who have been extubated after the first week of life. Even if this aspect renders that the studied in-  
10  
11 fants are not a homogeneous group, it has been proved that the attempted extubation directly from  
12  
13 HFOV at the proposed ventilatory setting ( $\text{MAP} \leq 6 \text{ cm H}_2\text{O}$ ) is valid even in ELBW infants venti-  
14  
15 lated for several days, with “incoming” BPD.

16  
17 Future randomized controlled trials will be needed to address these questions, also taking into ac-  
18  
19 count the possible effects on long-term respiratory outcomes.

20  
21 In conclusion, this study shows that in ELBW infants electively HFOV ventilated with an open lung  
22  
23 strategy, direct extubation from HFOV at  $\text{MAP} \leq 6 \text{ cm H}_2\text{O}$  with  $\text{FiO}_2 \leq 0.25$  is feasible. Our extuba-  
24  
25 tion success rate (83%) is comparable to and/or higher than success rates reported for extubation  
26  
27 from conventional mechanical ventilation in this very vulnerable class of infants.  
28  
29

### 30 31 32 33 **Declarations**

#### 34 35 *Funding*

36  
37 This research received no specific grant from any funding agency in the public, commercial or not-  
38  
39 for-profit sectors.

#### 40 41 42 *Ethical*

*approval*

43  
44 This study was approved by the Ethics Committee of the Department of Pediatrics of Fondazione  
45  
46 Policlinico Universitario A. Gemelli IRCCS, Rome, Italy - Università Cattolica del Sacro Cuore.

#### 47 48 *Availability of data and material*

49  
50 The datasets used and/or analysed during the current study are available from the corresponding au-  
51  
52 thor on reasonable request.

#### 53 54 55 *Competing interests*

56  
57 The authors declare that they have no competing interests.

### *Authors contributions*

MT designed the study, collected the data, analyzed the data, and wrote the first and final drafts of the manuscript. AL carried out the data collection and the literature search, assisted with the analysis, and provided significant edits to the manuscript. CT e CA carried out the data collection and drafted the initial manuscript. ET carried out the data collection and the initial analyses, reviewed and revised the manuscript. FS carried out the data collection, the literature search, reviewed and revised the manuscript. VP carried out the data collection, the literature search, reviewed and revised the manuscript. MC and PC carried out the data collection, the literature search, reviewed and revised the manuscript. VD, GB and CR carried out the data collection, the literature search, reviewed and made significant edits to the manuscript. RB carried out statistical analysis GV conceptualized and designed the study and critically reviewed the manuscript. All authors read and approved the submission of this version of the manuscript.

### **Acknowledgments**

We thank the families of the patients for their understanding and cooperation and the nursing staff for their invaluable support.

### **What is already known on this topic**

- Several studies founded the optimal timing of extubation during conventional mechanical ventilation, but extubation failure in ELBW infants remains a major problem.
- Extubation directly from HFOV is possible and desirable. In one study, the 90% success rate in preterm infants dropped to 81% in ELBW infants.
- In infants with birth weight  $\leq 1000$  g, a window of observation of 7 days may be necessary to adequately capture who will require reintubation.

### **What this study adds**

- In ELBW infants electively HFOV ventilated, direct extubation at  $MAP \leq 6$  cm H<sub>2</sub>O with  $FiO_2 \leq 0.25$  is feasible.

- Our success rate 7 days after the extubation attempt (83%) is higher than that reported for extubation from conventional mechanical ventilation in ELBW infants.
- A recruitment HFOV maneuver prior to surfactant administration may be helpful for successful extubation in ELBW infants.

## References

1. Support Study Group of the Eunice Kennedy Shriver NICHD Neonatal Research Network, Finer NN, Carlo WA, et al. Early CPAP versus surfactant in extremely preterm infants. *N Engl J Med* 2010; 362: 1970-9.
2. Morley CJ, Davis PG, Doyle LW, et al. Nasal CPAP or intubation at birth for very preterm infants. *N Engl J Med* 2008; 358 (7): 700-8.
3. Stoll BJ, Hansen NI, Bell EF, et al. Neonatal outcomes of extremely low birth weight infants from the NICHD neonatal research network. *Pediatrics* 2010; 126 (3): 443-56.
4. Miller JD, Carlo WA. Pulmonary complications of mechanical ventilation in neonates. *Clin Perinatol* 2008; 35 (1): 273-81.
5. Garland JS. Strategies to prevent ventilator-associated pneumonia in neonates. *Clin Perinatol* 2010; 37 (3): 629-43.
6. Walsh MC, Morris BH, Wrage La, et al. Extremely low birth weight neonates with protracted ventilation: mortality and 18-month neurodevelopmental outcomes. *J Pediatr* 2005; 146 (6): 798-804.
7. Sant'Anna GM, Keszler M. Weaning Infants from Mechanical Ventilation. *Clin Perinatol* 2012; (3):543-62
8. Vento G, Tortorolo L, Zecca E, et al: Spontaneous minute ventilation is a predictor of extubation failure in extremely-low-birth-weight infants. *J Matern Fetal Neonatal Med* 2004; 15: 147-54.

- 1  
2  
3 9. Dimitriou G, Greenough A, Endo A, et al: Prediction of extubation failure in preterm in-  
4  
5 fants. *Arch Dis Child Fetal Neonatal Ed* 2002; 86 (1): F32-F35.  
6
- 7 10. Szymankiewicz M, Vidyasagar D, Gadzinowski J: Predictors of successful extubation of  
8  
9 preterm infants with respiratory distress syndrome. *Pediatr Crit Care Med* 2005; 6: 44-49.  
10
- 11 11. Kamlin CO, Davis PG, Morley CJ: Predicting successful extubation of very low birth weight  
12  
13 infants. *Arch Dis Child Fetal Neonatal Ed* 2006 May; 91(3): F180-F183.  
14
- 15 12. Stefanescu BM, Murphy WP, Hansell BJ, et al. A randomized, controlled trial comparing  
16  
17 two different continuous positive airway pressure systems for the successful extubation of  
18  
19 extremely low birth weight infants. *Pediatrics* 2003; 112(5): 1031-8.  
20
- 21 13. Giaccone A, Jensen E, Davis PG, et al. Definitions of extubation success in very premature  
22  
23 infants: a systematic review. *Arch Dis Child Fetal Neonatal Ed*. 2014;99:F124-7.  
24
- 25 14. Manley BJ, Doyle LW, Owen LS, et al. Extubating Extremely Preterm Infants: Predictors of  
26  
27 Success and Outcomes following Failure. *J Pediatr*. 2016 Jun;173:45-9.  
28
- 29 15. Cools F, Offringa M, Askie LM. Elective high frequency oscillatory ventilation versus con-  
30  
31 ventional ventilation for acute pulmonary dysfunction in preterm infants. *Cochrane*  
32  
33 *database Syst Rev*. 2015;3:CD000104.  
34
- 35 16. Courtney SE, Durand DJ, Asselin JM, et al. High frequency oscillatory ventilation versus  
36  
37 conventional mechanical ventilation for very low birth weight infants. *N Engl J Med* 2002;  
38  
39 347: 643-652.  
40
- 41 17. Tana M, Zecca E, Tirone C, et al. Target fraction of inspired oxygen during open lung  
42  
43 strategy in neonatal high frequency oscillatory ventilation: a retrospective study. *Minerva*  
44  
45 *Anesthesiol* 2012;78(2):151-159.  
46  
47  
48  
49
- 50 18. Johnson AH, Peacock JL, Greenough A, et al: High-frequency oscillatory ventilation for the  
51  
52 prevention of chronic lung disease of prematurity. *N Engl J Med* 2002; 347: 633-642.  
53  
54  
55  
56  
57  
58  
59

- 1  
2  
3 19. Clark RH, Gerstmann DR, Null DM Jr, et al: Prospective randomized comparison of high-  
4  
5 frequency oscillatory and conventional ventilation in respiratory distress syndrome.  
6  
7 *Pediatrics* 1992; 89 (1): 5-12.
- 8  
9 20. van Velzen A, De Jaegere A, van der Lee J, et al. Feasibility of weaning and direct extuba-  
10  
11 tion from open lung high-frequency ventilation in preterm infants. *Pediatr Crit Care Med*.  
12  
13 2009 Jan;10(1):71-5.
- 14  
15 21. Vento G, Matassa PG, Ameglio F, et al. HFOV in premature neonates: effects on pulmonary  
16  
17 mechanics and epithelial lining fluid cytokines. A randomized controlled trial. *Intensive*  
18  
19 *Care Med* 2005;31:463-470.
- 20  
21 22. Schimdt B, Roberts RS, Davis P, et al. Caffeine therapy for apnea of prematurity. *N Engl J*  
22  
23 *Med*. 2006; 354 (20): 2112-21.
- 24  
25 23. Giannantonio C, Sammartino M, Valente E, et al. Remifentanil analgesedation in preterm  
26  
27 newborns during mechanical ventilation. *Acta Paediatr* 2009;98(7):1111-1115.
- 28  
29 24. Buzzella B, Claire N, D'Ugard C, et al. A randomized controlled trial of two nasal  
30  
31 continuous positive airway pressure levels after extubation in preterm infants. *J Pediatr*  
32  
33 2014 Jan;164(1):46-51.
- 34  
35 25. Gizzi C, Montecchia F, Panetta V, et al. Is synchronised NIPPV more effective than NIPPV  
36  
37 and NCPAP in treating apnoea of prematurity (AOP)? A randomised cross-over trial. *Arch*  
38  
39 *Dis Child Fetal Neonatal Ed*. 2015 Jan;100(1):F17-23.
- 40  
41 26. Zhu X-W, Zhao J-N, Tang S-F, et al. Noninvasive high-frequency oscillatory ventilation  
42  
43 versus nasal continuous positive airway pressure in preterm infants with moderate-severe  
44  
45 respiratory distress syndrome: A preliminary report. *Pediatr Pulmonol*. 2017;1-5.
- 46  
47  
48  
49  
50  
51  
52  
53  
54  
55  
56  
57  
58  
59  
60

**Table 1** Patient and maternal demographics, neonatal characteristics at the time of extubation.

|                                                       | <b>All infants<br/>n 108</b> | <b>Extubation<br/>Success<br/>Group<br/>n 90 (83%)</b> | <b>Extubation<br/>Failure<br/>Group<br/>n 18 (17%)</b> | <b>p</b>    |
|-------------------------------------------------------|------------------------------|--------------------------------------------------------|--------------------------------------------------------|-------------|
| Gestational Age, wks                                  | 26.2 ± 1.4                   | 26.3 ± 1.3                                             | 25.5 ± 1.4                                             | <b>0.02</b> |
| Birth Weight, g                                       | 742 ± 166                    | 750 ± 168                                              | 703 ± 159                                              | 0.29        |
| Complete course of<br>Antenatal Steroids <sup>a</sup> | 50 (46)                      | 42 (47)                                                | 8 (44)                                                 | 1           |
| 5-min Apgar Score                                     | 8 [2-9]                      | 7 [2-9]                                                | 8 [4-9]                                                | 0.50        |
| SGA                                                   | 31 (29)                      | 27 (30)                                                | 4 (22)                                                 | 0.58        |
| Male                                                  | 47 (44)                      | 35 (39)                                                | 12 (67)                                                | <b>0.04</b> |
| Premature Rupture of Membranes<br>>12 h               | 38 (35)                      | 29 (32)                                                | 9 (50)                                                 | 0.18        |
| Delivery by caesarean section                         | 82 (76)                      | 69 (77)                                                | 13 (72)                                                | 0.76        |
| Extubation weight g                                   | 739 ± 149                    | 741 ± 154                                              | 732 ± 142                                              | 0.82        |
| Extubation attempt d                                  | 4 [1-53]                     | 4 [1-53]                                               | 5 [1-19]                                               | 0.95        |
| Postnatal age at extubation, wks                      | 27.2 [24-32]                 | 27.2 [24-32]                                           | 26.3 [25-30]                                           | 0.31        |

Values expressed as mean ± SD, median [range] and number (percent). <sup>a</sup> A complete course of antenatal steroids was defined as two doses of betamethasone administered more than 24 hours but no more than 7 days before delivery; SGA: small for gestational age.



**Table 2** Ventilator settings, ventilation and transcutaneous blood gas values at baseline, pre-surfactant and at extubation time.

|                                                        | <b>Extubation<br/>Success<br/>Group</b> | <b>Extubation<br/>Failure<br/>Group</b> | <b>p</b>         |
|--------------------------------------------------------|-----------------------------------------|-----------------------------------------|------------------|
| <i>Baseline</i>                                        |                                         |                                         |                  |
| MAP (cmH <sub>2</sub> O)                               | 10.2 ± 1.1                              | 10.2 ± 1.0                              | 0.94             |
| FiO <sub>2</sub>                                       | 0.40 ± 0.17                             | 0.48 ± 0.24                             | 0.08             |
| Amplitude (%)                                          | 59 ± 33                                 | 56 ± 32                                 | 0.72             |
| Frequency (Hz)                                         | 9.6 ± 1.0                               | 9.7 ± 0.8                               | 0.69             |
| V <sub>T</sub> (ml/kg)                                 | 1.6 ± 0.6                               | 1.5 ± 0.5                               | 0.51             |
| DCO <sub>2</sub> (ml <sup>2</sup> /kg <sup>2</sup> /s) | 25 ± 15                                 | 25 ± 10                                 | 1                |
| TcPO <sub>2</sub> (mmHg)                               | 53 ± 12                                 | 50 ± 8                                  | 0.31             |
| TcPCO <sub>2</sub> (mmHg)                              | 52 ± 8                                  | 54 ± 4                                  | 0.30             |
| <i>Pre-surfactant</i>                                  |                                         |                                         |                  |
| MAP (cmH <sub>2</sub> O)                               | 13.1 ± 1.6                              | 11.9 ± 2.4                              | <b>0.02</b>      |
| FiO <sub>2</sub>                                       | 0.25 ± 0.01                             | 0.33 ± 0.08                             | <b>&lt;0.001</b> |
| Amplitude (%)                                          | 76 ± 30                                 | 62 ± 31                                 | 0.08             |
| Frequency (Hz)                                         | 9.3 ± 1.0                               | 9.6 ± 0.9                               | 0.30             |
| V <sub>T</sub> (ml/kg)                                 | 1.9 ± 0.6                               | 1.8 ± 0.4                               | 0.52             |
| DCO <sub>2</sub> (ml <sup>2</sup> /kg <sup>2</sup> /s) | 29 ± 15                                 | 29 ± 10                                 | 1                |
| TcPO <sub>2</sub> (mmHg)                               | 59 ± 16                                 | 54 ± 11                                 | 0.23             |
| TcPCO <sub>2</sub> (mmHg)                              | 46 ± 9                                  | 50 ± 4                                  | 0.08             |

1  
2  
3  
4  
5  
6  
7  
8  
9  
10  
11  
12  
13  
14  
15  
16  
17  
18  
19  
20

| <i>Extubation</i>                                      |             |             |      |
|--------------------------------------------------------|-------------|-------------|------|
| MAP (cmH <sub>2</sub> O)                               | 6.1 ± 0.9   | 6.1 ± 1.2   | 0.97 |
| FiO <sub>2</sub>                                       | 0.22 ± 0.03 | 0.23 ± 0.02 | 0.30 |
| Amplitude (%)                                          | 43 ± 24     | 39 ± 12     | 0.46 |
| Frequency (Hz)                                         | 9.3 ± 1.2   | 9.3 ± 0.7   | 0.88 |
| V <sub>T</sub> (ml/kg)                                 | 2.1 ± 0.6   | 1.9 ± 0.6   | 0.28 |
| DCO <sub>2</sub> (ml <sup>2</sup> /kg <sup>2</sup> /s) | 34 ± 11     | 35 ± 15     | 0.70 |
| TcPO <sub>2</sub> (mmHg)                               | 56 ± 5      | 54 ± 3      | 0.08 |
| TcPCO <sub>2</sub> (mmHg)                              | 48 ± 3      | 49 ± 2      | 0.18 |

21  
22  
23  
24  
25  
26  
27  
28  
29  
30  
31  
32  
33  
34  
35  
36  
37  
38  
39  
40  
41  
42  
43  
44  
45  
46  
47  
48  
49  
50  
51  
52  
53  
54  
55  
56  
57  
58  
59  
60

Values expressed as mean ± SD; MAP: mean airways pressure. TcPO<sub>2</sub>: transcutaneous partial pressure of O<sub>2</sub>; TcPCO<sub>2</sub>: transcutaneous partial pressure of CO<sub>2</sub>; V<sub>T</sub>: Tidal Volume HFOV; DCO<sub>2</sub>: coefficient of gas transport.

**Table 3** Mortality and respiratory outcomes.

|                        | <b>Extubation<br/>Success<br/>Group</b> | <b>Extubation<br/>Failure<br/>Group</b> | <b>p</b>     |
|------------------------|-----------------------------------------|-----------------------------------------|--------------|
| Mortality              | 11(12)                                  | 1(5)                                    | 0.68         |
| > 1 dose of surfactant | 19 (21)                                 | 10 (56)                                 | <b>0.006</b> |
| Total ventilator d     | 8 [0.3-137]                             | 16 [0.5-84]                             | <b>0.02</b>  |
| Total oxygen d         | 31 [0-200]                              | 41 [0.4-193]                            | 0.18         |
| BPD*                   | 16/79 (20)                              | 6/17 (35)                               | 0.20         |

Values expressed as median [range] and number (percent). BPD: bronchopulmonary dysplasia.

\*Data are referred to >36 weeks postmenstrual age survivors babies only.

**Table 4** Risks factors for Extubation Outcome: multivariable analysis

| <b>Extubation Success Group</b>                | <b>OR</b> | <b>95% CI</b> | <b>p</b>    |
|------------------------------------------------|-----------|---------------|-------------|
| Gestational Age (weeks)                        | 1.71      | 1.04, 2.08    | <b>0.03</b> |
| Male                                           | 3.08      | 0.85, 11.2    | 0.09        |
| MAP (cmH <sub>2</sub> O) <i>pre-surfactant</i> | 1.51      | 1.06, 2.15    | <b>0.02</b> |
| FiO <sub>2</sub> <i>pre-surfactant</i>         | 0.06      | 0.00, 1.57    | 0.09        |
| > 1 dose of surfactant                         | 0.31      | 0.09, 1.16    | 0.08        |

FiO<sub>2</sub>: fraction of inspired oxygen; MAP: mean airways pressure.

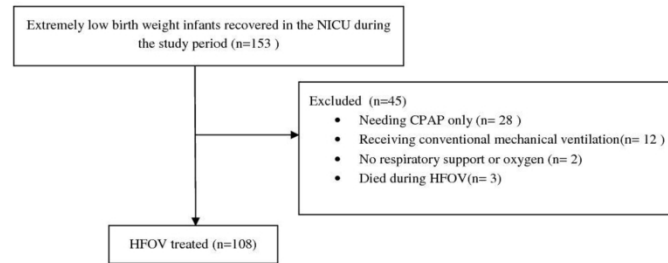

**Fig. 1 Infants flow diagram during the study period**

HFOV: High-frequency oscillatory ventilation; CPAP: continuous positive airway pressure

431x610mm (300 x 300 DPI)

# BMJ Paediatrics Open

## Extubation from high-frequency oscillatory ventilation in extremely low birth weight infants: a prospective observational study

|                               |                                                                                                                                                                                                                                                                                                                                                                                                                                                                                                                                                                                                                                                                                                                                                                                                                                                                                                                                                                                                                                                                                                                                                                                                                                                                                                                                                                                                                                                                                                                                                                                                                                                                                                                                                                                                                                                                                                                                                               |
|-------------------------------|---------------------------------------------------------------------------------------------------------------------------------------------------------------------------------------------------------------------------------------------------------------------------------------------------------------------------------------------------------------------------------------------------------------------------------------------------------------------------------------------------------------------------------------------------------------------------------------------------------------------------------------------------------------------------------------------------------------------------------------------------------------------------------------------------------------------------------------------------------------------------------------------------------------------------------------------------------------------------------------------------------------------------------------------------------------------------------------------------------------------------------------------------------------------------------------------------------------------------------------------------------------------------------------------------------------------------------------------------------------------------------------------------------------------------------------------------------------------------------------------------------------------------------------------------------------------------------------------------------------------------------------------------------------------------------------------------------------------------------------------------------------------------------------------------------------------------------------------------------------------------------------------------------------------------------------------------------------|
| Journal:                      | <i>BMJ Paediatrics Open</i>                                                                                                                                                                                                                                                                                                                                                                                                                                                                                                                                                                                                                                                                                                                                                                                                                                                                                                                                                                                                                                                                                                                                                                                                                                                                                                                                                                                                                                                                                                                                                                                                                                                                                                                                                                                                                                                                                                                                   |
| Manuscript ID                 | bmjpo-2018-000350.R2                                                                                                                                                                                                                                                                                                                                                                                                                                                                                                                                                                                                                                                                                                                                                                                                                                                                                                                                                                                                                                                                                                                                                                                                                                                                                                                                                                                                                                                                                                                                                                                                                                                                                                                                                                                                                                                                                                                                          |
| Article Type:                 | Original article                                                                                                                                                                                                                                                                                                                                                                                                                                                                                                                                                                                                                                                                                                                                                                                                                                                                                                                                                                                                                                                                                                                                                                                                                                                                                                                                                                                                                                                                                                                                                                                                                                                                                                                                                                                                                                                                                                                                              |
| Date Submitted by the Author: | 02-Oct-2018                                                                                                                                                                                                                                                                                                                                                                                                                                                                                                                                                                                                                                                                                                                                                                                                                                                                                                                                                                                                                                                                                                                                                                                                                                                                                                                                                                                                                                                                                                                                                                                                                                                                                                                                                                                                                                                                                                                                                   |
| Complete List of Authors:     | Tana, Milena; Fondazione Policlinico Universitario A. Gemelli IRCCS, Roma, Italia. Unità Operativa Complessa di Neonatologia.<br>Lio, Alessandra; Fondazione Policlinico Universitario A. Gemelli IRCCS, Roma, Italia. Unità Operativa Complessa di Neonatologia.<br>Tirone, Chiara; Fondazione Policlinico Universitario A. Gemelli IRCCS, Roma, Italia. Unità Operativa Complessa di Neonatologia.<br>Aurilia, Claudia; Fondazione Policlinico Universitario A. Gemelli IRCCS, Roma, Italia. Unità Operativa Complessa di Neonatologia.<br>Tiberi, Eloisa; Fondazione Policlinico Universitario A. Gemelli IRCCS, Roma, Italia. Unità Operativa Complessa di Neonatologia.<br>Serrao, Francesca; Fondazione Policlinico Universitario A. Gemelli IRCCS, Roma, Italia. Unità Operativa Complessa di Neonatologia.<br>Purcaro, Velia; Fondazione Policlinico Universitario A. Gemelli IRCCS, Roma, Italia. Unità Operativa Complessa di Neonatologia.<br>Corsello, Mirta; Fondazione Policlinico Universitario A. Gemelli IRCCS, Roma, Italia. Unità Operativa Complessa di Neonatologia.<br>Catenazzi, Piero; Fondazione Policlinico Universitario A. Gemelli IRCCS, Roma, Italia. Unità Operativa Complessa di Neonatologia.<br>D'Andrea, Vito; Fondazione Policlinico Universitario A. Gemelli IRCCS, Roma, Italia. Unità Operativa Complessa di Neonatologia.<br>Barone, Giovanni; Fondazione Policlinico Universitario A. Gemelli IRCCS, Roma, Italia. Unità Operativa Complessa di Neonatologia.<br>Ricci, Cinzia; Fondazione Policlinico Universitario A. Gemelli IRCCS, Roma, Italia. Unità Operativa Complessa di Neonatologia.<br>Pastorino, Roberta; Università Cattolica del Sacro Cuore, Roma, Italia., Section of Hygiene. Institute of Public Health.<br>Vento, Giovanni; Fondazione Policlinico Universitario A. Gemelli IRCCS, Roma, Italia. Unità Operativa Complessa di Neonatologia.; Università Cattolica del Sacro Cuore, Roma, Italia. |
| Keywords:                     | Neonatology                                                                                                                                                                                                                                                                                                                                                                                                                                                                                                                                                                                                                                                                                                                                                                                                                                                                                                                                                                                                                                                                                                                                                                                                                                                                                                                                                                                                                                                                                                                                                                                                                                                                                                                                                                                                                                                                                                                                                   |
|                               |                                                                                                                                                                                                                                                                                                                                                                                                                                                                                                                                                                                                                                                                                                                                                                                                                                                                                                                                                                                                                                                                                                                                                                                                                                                                                                                                                                                                                                                                                                                                                                                                                                                                                                                                                                                                                                                                                                                                                               |

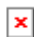

1  
2  
3  
4  
5  
6  
7  
8  
9  
10  
11  
12  
13  
14  
15  
16  
17  
18  
19  
20  
21  
22  
23  
24  
25  
26  
27  
28  
29  
30  
31  
32  
33  
34  
35  
36  
37  
38  
39  
40  
41  
42  
43  
44  
45  
46  
47  
48  
49  
50  
51  
52  
53  
54  
55  
56  
57  
58  
59  
60

1  
2  
3 **Extubation from high-frequency oscillatory ventilation in extremely low birth weight infants:**  
4 **a prospective observational study**  
5  
6

7 Milena Tana<sup>1</sup>, Alessandra Lio<sup>1</sup>, Chiara Tirone<sup>1</sup>, Claudia Aurilia<sup>1</sup>, Eloisa Tiberi<sup>1</sup>, Francesca Serrao<sup>1</sup>,  
8 Velia Purcaro<sup>1</sup>, Mirta Corsello<sup>1</sup>, Piero Catenazzi<sup>1</sup>, Vito D'Andrea<sup>1</sup>, Giovanni Barone<sup>1</sup>, Cinzia  
9 Ricci<sup>1</sup>, Roberta Pastorino<sup>2</sup>, Giovanni Vento<sup>1,3</sup>  
10  
11

12 <sup>1</sup>Fondazione Policlinico Universitario A. Gemelli IRCCS, Roma, Italia. Unità Operativa Complessa  
13 di Neonatologia.  
14

15 <sup>2</sup>Università Cattolica del Sacro Cuore, Roma, Italia. Section of Hygiene, Institute of Public Health,  
16

17 <sup>3</sup>Università Cattolica del Sacro Cuore, Roma, Italia.  
18  
19

20 **E-mail addresses:**

21 Milena Tana: [milenatana@yahoo.it](mailto:milenatana@yahoo.it)

22 Alessandra Lio: [alelio@hotmail.it](mailto:alelio@hotmail.it)

23 Chiara Tirone: [chiaratirone@tiscali.it](mailto:chiaratirone@tiscali.it)

24 Claudia Aurilia: [claudiaurilia@hotmail.it](mailto:claudiaurilia@hotmail.it)

25 Eloisa Tiberi: [eloisatiberi@yahoo.it](mailto:eloisatiberi@yahoo.it)

26 Francesca Serrao: [Francesca.serrao@yahoo.it](mailto:Francesca.serrao@yahoo.it)

27 Velia Purcaro: [veliapurcaro@yahoo.it](mailto:veliapurcaro@yahoo.it)

28 Mirta Corsello: [mirtacors@hotmail.it](mailto:mirtacors@hotmail.it)

29 Piero Catenazzi: [piero.catenazzi@gmail.com](mailto:piero.catenazzi@gmail.com)

30 Vito D'Andrea: [dandrea.vito@gmail.com](mailto:dandrea.vito@gmail.com)

31 Giovanni Barone: [gbarone85@yahoo.it](mailto:gbarone85@yahoo.it)

32 Cinzia Ricci: [cinziar87@hotmail.it](mailto:cinziar87@hotmail.it)

33 Roberta Pastorino: [roberta.pastorino@unicatt.it](mailto:roberta.pastorino@unicatt.it)

34 Giovanni Vento: [giovanni.vento@unicatt.it](mailto:giovanni.vento@unicatt.it)

35 Address correspondence to: Giovanni Vento, Unità Operativa Complessa di Neonatologia, Area  
36 Salute del bambino, Dipartimento di Scienza della Salute della Donna e del Bambino. Fondazione  
37 Policlinico Universitario A. Gemelli IRCCS, Roma - Università Cattolica del Sacro Cuore.  
38

39 Largo A. Gemelli, 8 00168 Rome, Italy [[giovanni.vento@unicatt.it](mailto:giovanni.vento@unicatt.it)], Phone ++39-06-30154357; Fax  
40 ++39-06-338321  
41  
42  
43  
44  
45  
46  
47  
48  
49  
50



**Abstract**

**Objective:** To evaluate if weaning from high frequency oscillatory ventilation (HFOV) directly to a non-invasive mode of respiratory support is feasible and results in successful extubation in extremely low birth weight (ELBW) infants.

**Design:** Prospective observational study.

**Setting:** Tertiary neonatal intensive care unit.

**Patients:** One hundred and eight ELBW infants of  $26.2 \pm 1.4$  weeks of gestational age directly extubated from HFOV.

**Interventions:** All infants were managed with elective HFOV and received surfactant after a recruitment HFOV maneuver. Extubation was attempted at mean airways pressure (MAP)  $\leq 6$  cmH<sub>2</sub>O with FiO<sub>2</sub>  $\leq 0.25$ . After extubation, all infants were supported by nasal CPAP (6-8 cm H<sub>2</sub>O).

**Main outcome measures:** Extubation failure (clinical deterioration requiring re-intubation) was defined as shorter than 7 days.

**Results:** Ninety patients (83%) were successfully extubated and 18 (17%) required re-intubation. No significant differences were found between the two groups in terms of birth weight, day of life and weight at the time of extubation. Multivariable analysis showed that gestational age (OR 1.71; 95% CI 1.04, 2.08) and higher MAP prior to surfactant (OR 1.51; 95% CI 1.06, 2.15) were associated with successful extubation.

**Conclusions:** In ELBW infants direct extubation from HFOV at MAP  $\leq 6$  cm H<sub>2</sub>O with FiO<sub>2</sub>  $\leq 0.25$  is feasible. Our extubation success rate (83%) is higher than conventional mechanical ventilation in this very vulnerable class of infants.

**Key words:** HFOV, Extubation criteria, ELBW infants, Respiratory distress syndrome, Mean airway pressure

## Introduction

Despite the increased use of non-invasive respiratory support, mechanical ventilation may be life-saving in preterm infants with respiratory failure, especially in extremely low birth weight (ELBW) infants (birth weight < 1000 g) (1, 2). A prolonged endotracheal intubation is associated with risks and complications, including bronchopulmonary dysplasia (BPD) (1-6), therefore clinicians should wean and extubate ELBW infants as soon as possible (7). Several studies tried to find the optimal timing of extubation of preterm infants treated with conventional mechanical ventilation (CMV) (8-14). In these studies, success of extubation in ELBW infants ranged from 52% to 73% (8, 14), and this is why extubation failure remains a major problem. In the last years, high-frequency oscillatory ventilation (HFOV) has been increasingly used in preterm infants with respiratory failure, because early HFOV could reduce risk of BPD (15), especially if associated with an open lung strategy (16,17). Despite that, data on weaning and extubation criteria are limited, especially in ELBW infants. Some clinicians are more comfortable in switching from HFOV to CMV to wean and extubate the infants (18), but this combined strategy could reduce the efficacy of HFOV alone to decrease the incidence of BPD (19). Direct extubation from HFOV is possible and may even be desirable (7, 16). Van Velzen et al. showed that weaning the mean airways pressure (MAP) below 8 cmH<sub>2</sub>O with a fraction of inspired oxygen (FiO<sub>2</sub>) below 0.30 is feasible during open lung HFOV and direct extubation at these settings is successful in 90% of preterm infants < 37 weeks of gestational age (GA). However, the success rate dropped to 81% in 68 ELBW studied infants (20). Compared to the experience of van Velzen et al., our study is aimed at: the extubation process from HFOV in ELBW infants only (i.e. the population at greater risk of ventilator-induced lung injury); evaluating the success or failure of the extubation attempt over a longer period of time (7 days instead of 48 hours after extubation); and the safety of lower pre-extubation MAP values ( $\leq 6$  cm H<sub>2</sub>O instead of 8 cm H<sub>2</sub>O) as the most appropriate ventilatory set for ELBW neonates. The aim of the present study is therefore to evaluate in a cohort of ELBW infants treated with elective open lung HFOV if MAP  $\leq 6$  cm H<sub>2</sub>O and FiO<sub>2</sub>  $\leq 0.25$  are feasible and successfully associated with

1  
2  
3 direct HFOV extubation during a 7-day observation window, as longer periods may be needed to  
4  
5 adequately capture this outcome in ELBW infants (13, 14).  
6  
7

## 8 9 **Methods**

### 10 11 **Patients**

12  
13 This study was approved by the Ethics Committee of the Department of Pediatrics of Fondazione  
14  
15 Policlinico Universitario A. Gemelli IRCCS, Roma - Università Cattolica del Sacro Cuore, which  
16  
17 waived the need for parental consent. Between June 2011 and June 2014, inborn ELBW infants  
18  
19 were included in this prospective observational study if they met the following conditions: a  
20  
21 diagnosis of respiratory distress syndrome (RDS), requiring endotracheal intubation at birth or  
22  
23 failing nasal continuous positive airway pressure (CPAP) within 24 hours of life; electively HFOV  
24  
25 ventilated and receiving surfactant treatment; and directly extubated from HFOV.  
26  
27

### 28 29 **HFOV strategy**

30  
31 HFOV is actually the elective modality of ventilation in preterm newborns with  $GA \leq 27$  weeks  
32  
33 and/or ELBW infants in our NICU, as a result of our previous randomized controlled trial  
34  
35 comparing the effects of HFOV vs CMV (21). HFOV was delivered by a Dräger Babylog 8000 *plus*  
36  
37 ventilator (Dräger, Lubeck, Germany) with an “optimum lung volume strategy“ prior to surfactant  
38  
39 administration, recruiting collapsed alveoli using oxygenation with a  $FiO_2$  target  $\leq 0.25$  as an  
40  
41 indirect parameter for lung volume (17).  
42

43  
44 Ventilation was started at a MAP of 10 cmH<sub>2</sub>O, a frequency of 10 Hz, and an amplitude of 30%,  
45  
46 increased if necessary until the infant’s chest was seen to be visibly vibrating. The  $FiO_2$  was  
47  
48 initially set to ensure adequate oxygen saturation ( $SpO_2$  90-95%). If the  $FiO_2$  was  $> 0.25$ , the MAP  
49  
50 was increased by 1-2 cmH<sub>2</sub>O every 2-5 minutes until  $FiO_2$  reached  $\leq 0.25$ . The recruitment was  
51  
52 stopped if oxygenation no longer improved or there were signs of lung hyperinflation (capillary  
53  
54 refill time  $> 3$  seconds and/or hypotension). This approach provides a more effective means to  
55  
56 recruit and protect acutely injured lungs (17). Surfactant was administered at the end of the  
57  
58  
59  
60

1  
2  
3 recruitment procedure. Transcutaneous partial pressure of CO<sub>2</sub> (TcPCO<sub>2</sub>) and/or PaCO<sub>2</sub> were  
4 managed by adjustment of the oscillatory amplitude and then of the frequency. The goals of  
5 respiratory management were to maintain blood gas values of: pH 7.30-7.45, PaCO<sub>2</sub> and/or TcPCO<sub>2</sub>  
6 45-55 mm Hg, PaO<sub>2</sub> and/or transcutaneous partial pressure of O<sub>2</sub> (TcPO<sub>2</sub>) 50-70 mm Hg and SpO<sub>2</sub>  
7 90-95%. All patients received a loading dose of caffeine (20 mg/kg) immediately after admission to  
8 the NICU, then maintenance therapy (22) and Remifentanil by continuous intravenous infusion at a  
9 dose of 0.075 µg/kg/min to provide analgesia during HFOV while preserving spontaneous  
10 respiratory activity (23). Doxapram was not used during the study period as per our departmental  
11 protocols.  
12  
13  
14  
15  
16  
17  
18  
19  
20  
21

### 22 **Weaning and extubation criteria**

23  
24 HFOV ventilation was managed to ensure to patients the lowest possible MAP, amplitude and FiO<sub>2</sub>  
25 in order to minimize ventilator-induced lung injury. Reduction in MAP was gradually accomplished  
26 following oxygenation and lung expansion estimated by chest radiographs. FiO<sub>2</sub> was adjusted to  
27 maintain adequate oxygenation. Reduction of amplitude was gradually accomplished following  
28 TcPCO<sub>2</sub> and/or PaCO<sub>2</sub> values. Extubation was attempted when the neonate's condition remained  
29 stable for at least 6 hours, receiving ventilation with MAP ≤ 6 cm H<sub>2</sub>O and FiO<sub>2</sub> ≤ 0.25. At that  
30 point in time a FiO<sub>2</sub> > 0.25 and ≤ 0.30 was acceptable, to ensure that the extubation was not delayed  
31 by small fluctuations in oxygen need.  
32  
33  
34  
35  
36  
37  
38  
39  
40

41 After extubation all the patients were supported by nasal CPAP at 6-8 cmH<sub>2</sub>O using short binasal  
42 prongs of appropriate size while nasal ventilation was not administered. Extubation failure was  
43 defined as clinical deterioration requiring re-intubation during the following 7 days (13,14). All data  
44 refer only to the first extubation attempt in the studied neonates.  
45  
46  
47  
48  
49

50 The indications for reintubation were: a) repeated episodes of apnea defined as >4 episodes of  
51 apnea per hour (or >2 episodes of apnea per hour when ventilation with bag and mask was  
52 required); b) hypoxia defined as FiO<sub>2</sub> > 0.50 to maintain SpO<sub>2</sub> 90-95% for more than 2 hours  
53  
54  
55  
56  
57  
58  
59  
60

1  
2  
3 despite 8 cm H<sub>2</sub>O of CPAP; c) development of respiratory acidosis indicated by 2 consecutive  
4  
5 blood gases with PaCO<sub>2</sub> ≥65 mm Hg and pH < 7.20.

### 6 7 **Data collection**

8  
9 Demographic data on patient and maternal characteristics were collected from each patient. Data  
10  
11 were collected on MAP, FiO<sub>2</sub>, amplitude, frequency, DCO<sub>2</sub>, Tidal Volume HFOV (V<sub>T</sub>), TcPO<sub>2</sub>,  
12  
13 TcPCO<sub>2</sub> at start of ventilation and at the time of extubation attempt. Finally, data on MAP and FiO<sub>2</sub>  
14  
15 were collected at the end of HFOV recruitment procedure, immediately prior to surfactant  
16  
17 administration. The number of patients failing extubation was collected, including the main reason  
18  
19 for failure and the time of re-intubation. Weight and day of life at extubation, duration of  
20  
21 mechanical ventilation and O<sub>2</sub>-therapy during the hospital stay, requirement of additional doses of  
22  
23 surfactant and development of BPD (O<sub>2</sub>-dependence at 36 weeks of postmenstrual age) were also  
24  
25 reported for each patient.  
26  
27

### 28 29 **Statistical analysis**

30  
31 Values were expressed as mean and SD or median and range for continuous variables or absolute  
32  
33 frequency and percentages for categorical variables. Continuous variables were compared with  
34  
35 parametric (Student's t test) or non-parametric (Mann Whitney U test) tests as appropriate.  
36  
37 Categorical variables were compared by using a two-tailed Fisher's exact test. A 2-tailed value of  
38  
39 p<0.05 was considered significant. Data were analysed using commercial statistical software  
40  
41 (Graphpad Prism V.5.0a; Chicago, Illinois, USA).  
42  
43

44  
45 In order to evaluate the association between the successful extubation and each explanatory  
46  
47 variable, a univariable analysis was performed using a logistic regression model by including one  
48  
49 variable at a time. The independent variables found to be significant in the univariable analyses (p  
50  
51 value ≤ 0.05) were included in the multivariable model. A likelihood ratio test was used to compare  
52  
53 the suitability of the models and to select the most appropriate model. Statistical analyses were done  
54  
55 with Stata version 2013 software (Stata Statistical Software: Release 13, College Station, Texas,  
56  
57 USA).  
58  
59  
60

## Results

During the study period, 108 ELBW infants with RDS required elective HFOV within 24 hours of life and were directly extubated from HFOV (Figure 1). Extubation was attempted at a median [range] age of 4 [1-53] days (Table 1). All the comparisons were made between newborns successfully extubated (Extubation Success Group) and newborns failing the extubation attempt (Extubation Failure Group). The percentage of newborns successfully extubated was 83%. The only significant differences between the two groups were the higher percentage of males in the neonates who failed extubation and their lower GA (Table 1).

Thirteen infants failed extubation within 72 hours and were reintubated at a median [range] time of 24 [2-48] hours for hypoxia (n 3), hypercapnia (n 5) and apnea (n 5). Another five newborns who failed extubation after 72 hours and within 7 days were reintubated at a median [range] time of 120 [96-160] hours for hypoxia (n 3), and apnea (n 2). Of the 18 infants who met failure criteria within 7 days after extubation: 7 (39%) failed due to apnea; 6 (33%) due to hypoxia; and 5 (28%) due to hypercapnia. No newborn who failed extubation had an episode of suspected or confirmed sepsis during the 7-day period after extubation.

Regarding to the ventilator setting at the baseline, no significant differences were observed between the two groups (Table 2). Prior to surfactant administration, the neonates of the Extubation Success Group received ventilation with a significantly higher MAP and lower  $FiO_2$  ( $p = 0.02$  and  $p < 0.001$  respectively) in comparison to the newborns of the Extubation Failure Group (Table 2). At extubation, there were no differences in MAP,  $FiO_2$ , amplitude, or frequency between infants who were successfully extubated and those who failed extubation (Table 2).

Finally, the neonates of Extubation Failure Group required treatment with additional doses of surfactant more frequently than infants of Extubation Success Group ( $p=0.006$ ) and received a significantly longer period of mechanical ventilation ( $p=0.02$ ) (Table 3). Although the neonates of the Extubation Failure Group had a higher percentage of BPD, the difference was not statistically significant (Table 3).

1  
2  
3 Multivariable analysis showed that GA (OR 1.71; 95% CI 1.04, 2.08) and higher MAP prior to  
4  
5  
6  
7  
8  
9  
10  
11  
12  
13  
14  
15  
16  
17  
18  
19  
20  
21  
22  
23  
24  
25  
26  
27  
28  
29  
30  
31  
32  
33  
34  
35  
36  
37  
38  
39  
40  
41  
42  
43  
44  
45  
46  
47  
48  
49  
50  
51  
52  
53  
54  
55  
56  
57  
58  
59  
60

Multivariable analysis showed that GA (OR 1.71; 95% CI 1.04, 2.08) and higher MAP prior to surfactant (OR 1.51; 95% CI 1.06, 2.15) were associated with successful extubation (Table 4).

## Discussion

In comparison to the only experience reported on the successful extubation rates directly from HFOV by van Velzen et al (20), referring to a heterogeneous population of 214 preterm infants and including only 68 neonates with a birth weight  $\leq 1000$  g, our report provides more detailed data on the extubation process during HFOV in a large cohort of ELBW infants. Moreover, our study evaluated the success or failure of the extubation attempt over a longer period of time (within 7 days), compared to the usually shorter time windows ( $\leq 48$  or  $\leq 72$  hours after extubation). This is particularly important, considering the recent remarks by Giaccone et al. (13), which showed that in studies predominately enrolling ELBW infants, rates of extubation success were negatively associated with the duration of observation. By relying on shorter windows of observation, studies enrolling a larger proportion of small infants may therefore underestimate the true rate of reintubation. In fact, the reintubation rate did not appear to plateau even after a week of observation, indicating that longer periods may be necessary to adequately capture this outcome in ELBW infants (13).

In our experience, neonates of the Extubation Failure Group prior to surfactant administration received ventilation with a significantly lower MAP ( $p < 0.05$ ) and a significantly higher  $\text{FiO}_2$  ( $p < 0.001$ ) in comparison respect to the newborns of the Extubation Success Group (Table 2). A lower MAP prior surfactant was confirmed by multivariable analysis as an independent risk factor for extubation failure (Table 2 e 4). This occurred despite our protocol of optimal lung volume strategy aiming to fully recruit the lung before surfactant therapy, increasing step-by-step MAP until the target  $\text{FiO}_2$  of 0.25 had been reached: in case of the neonates who failed extubation, surfactant had been administered before achieving optimal lung recruitment. Even though they were affected by a more severe RDS, as demonstrated by the higher baseline  $\text{FiO}_2$  in comparison to the

1  
2  
3 neonates who experienced successful extubation, the importance of fully recruiting the lung before  
4  
5 surfactant administration should be taken into account, because of the significant association of  
6  
7 optimal lung volume strategy with better respiratory outcomes (17). Neonates of the Extubation  
8  
9 Failure Group received in fact more frequently additional surfactant doses (Table 3).

10  
11 When compared to the only study reporting the feasibility of weaning and direct extubation from  
12  
13 HFOV in ELBW infants (20), our data showed similar rates of successful extubation: 88% within  
14  
15 72 hours and 83% within 7 days after the extubation attempt, vs 81% within 48 hours only,  
16  
17 respectively. More importantly, our rates of extubation failure are lower than those recently  
18  
19 reported by Giaccone et al. in a recent systematic review on the definition of extubation success in  
20  
21 very premature infants (13). In the multivariable linear regression analysis, median subject's birth  
22  
23 weight  $\leq 1000$  g was found to be an effect modifier ( $p=0.03$ ) in the association between duration of  
24  
25 post-extubation observation and rate of reintubation. After stratifying the analysis for this variable,  
26  
27 the authors found that in studies of infants with median birth weight  $\leq 1000$  g, the reintubation rate  
28  
29 increased significantly with longer duration of observation ( $p=0.001$ ). In particular, the mean  
30  
31 reintubation rate in the newborns with median birth weight  $\leq 1000$  g increased from 25% at 72 hours  
32  
33 to 35% at 168 hours, with the latter result being more than double of that reported in our experience  
34  
35 (17%). It is however necessary to keep in mind that by prolonging the observation period, the  
36  
37 chances of reintubation for a different cause of respiratory failure (i.e. sepsis) increase. In our  
38  
39 experience, no newborn who failed extubation had an episode of suspected or confirmed sepsis  
40  
41 during the 7-day period after extubation.

42  
43  
44  
45  
46 In our study, the neonates failing extubation had significantly lower GA compared with infants  
47  
48 successfully extubated, with the lower GA being an independent risk factor for extubation failure in  
49  
50 the multivariable analysis (Table 1 e 4). Apnea was the main reason for reintubation (39% of cases)  
51  
52 stressing the important role of the central inspiratory drive in determining the premature infant's  
53  
54 ability to maintain adequate, independent ventilation. The use of other non-invasive respiratory  
55  
56 support, alternatives to CPAP alone in the post-extubation period (i.e. nasal intermittent mandatory  
57  
58  
59  
60



1  
2  
3 ventilation and/or bilevel CPAP), might be a better strategy to overcome this problem. Recently  
4 Buzzella et al showed that in preterm infants with residual lung disease nasal CPAP in the range of  
5 7-9 cmH<sub>2</sub>O it was more effective in reducing extubation failure than a range of 4-6 cmH<sub>2</sub>O (24).  
6  
7 These findings suggest: the need for higher distending pressure post-extubation to obtain better  
8 oxygenation with a more stable lung volume and reduced pulmonary shunt in the more immature  
9 infants who are still oxygen-dependent; the improved oxygenation and lung volume stability may  
10 have also attenuated central and obstructive apnea (24). Hypoxia and hypercapnia accounted for  
11 most of extubation failure attempts after the first 24 hours (8 out of 13, 61%): a recruitment  
12 maneuver to try to adequately open the lung could play an important role in preventing extubation  
13 failure, as suggested by the results of multivariable analysis. Importantly, we used MAP ≤ 6 cmH<sub>2</sub>O  
14 and FiO<sub>2</sub> ≤ 0.25 as criteria to attempt extubation. Using these lower setting in comparison to those  
15 adopted by van Velzen (20) may improve the success rate of extubation but it may also prolong the  
16 time on the ventilator. Future studies could evaluate if extubation at higher HFOV settings in  
17 ELBW infants could results in similar rates of extubation failure while reducing the ventilation  
18 time.  
19  
20  
21  
22  
23  
24  
25  
26  
27  
28  
29  
30  
31  
32  
33  
34

35 Although our study suggests that direct extubation from HFOV is feasible in ELBW infants, there  
36 are some limitations and important questions that remain to be answered. First of all, the small  
37 number of ELBW infants failing extubation could limit the power to detect differences between  
38 groups and might have affected the accuracy of our estimates. Moreover, higher level of CPAP  
39 post-extubation (7-9 cm H<sub>2</sub>O) or other non-invasive respiratory support, such as synchronized nasal  
40 IPPV (25) or nasal HFOV (26), could be used to improve the success rate of extubation in ELBW  
41 infants.  
42  
43  
44  
45  
46  
47  
48  
49

50 Future randomized controlled trials will be needed to address these questions, also taking into  
51 account the possible effects on long-term respiratory outcomes.  
52  
53

54 In conclusion, this study shows that in ELBW infants electively HFOV ventilated with an open lung  
55 strategy, direct extubation from HFOV at MAP ≤ 6 cm H<sub>2</sub>O with FiO<sub>2</sub> ≤ 0.25 is feasible. Our  
56  
57  
58  
59  
60

1  
2  
3 extubation success rate (83%) is comparable to and/or higher than success rates reported for  
4  
5 extubation from conventional mechanical ventilation in this very vulnerable class of infants.  
6  
7  
8

## 9 **Declarations**

### 10 *Funding*

11  
12  
13 This research received no specific grant from any funding agency in the public, commercial or not-  
14  
15 for-profit sectors.  
16

### 17 *Ethical*

*approval*

18  
19  
20 This study was approved by the Ethics Committee of the Department of Pediatrics of Fondazione  
21  
22 Policlinico Universitario A. Gemelli IRCCS, Rome, Italy - Università Cattolica del Sacro Cuore.  
23

### 24 *Availability of data and material*

25  
26 The datasets used and/or analysed during the current study are available from the corresponding  
27  
28 author on reasonable request.  
29

### 30 *Competing interests*

31  
32  
33 The authors declare that they have no competing interests.  
34

### 35 *Authors contributions*

36  
37 MT designed the study, collected the data, analyzed the data, and wrote the first and final drafts of  
38  
39 the manuscript. AL carried out the data collection and the literature search, assisted with the  
40  
41 analysis, and provided significant edits to the manuscript. CT e CA carried out the data collection  
42  
43 and drafted the initial manuscript. ET carried out the data collection and the initial analyses,  
44  
45 reviewed and revised the manuscript. FS carried out the data collection, the literature search,  
46  
47 reviewed and revised the manuscript. VP carried out the data collection, the literature search,  
48  
49 reviewed and revised the manuscript. MC and PC carried out the data collection, the literature  
50  
51 search, reviewed and revised the manuscript. VD, GB and CR carried out the data collection, the  
52  
53 literature search, reviewed and made significant edits to the manuscript. RB carried out statistical  
54  
55  
56  
57  
58  
59  
60

1  
2  
3 analysis GV conceptualized and designed the study and critically reviewed the manuscript. All  
4  
5 authors read and approved the submission of this version of the manuscript.  
6

### 7 **Acknowledgments**

8  
9 We thank the families of the patients for their understanding and cooperation and the nursing staff  
10 for their invaluable support.  
11

### 12 **What is already known on this topic**

- 13 • Several studies founded the optimal timing of extubation during conventional mechanical  
14 ventilation, but extubation failure in ELBW infants remains a major problem.  
15
- 16 • Extubation directly from HFOV is possible and desirable. In one study, the 90% success rate  
17 in preterm infants dropped to 81% in ELBW infants.  
18
- 19 • In infants with birth weight  $\leq 1000$  g, a window of observation of 7 days may be necessary to  
20 adequately capture who will require reintubation.  
21  
22  
23  
24  
25  
26  
27  
28  
29

### 30 **What this study adds**

- 31 • In ELBW infants electively HFOV ventilated, direct extubation at  $\text{MAP} \leq 6$  cm  $\text{H}_2\text{O}$  with  
32  $\text{FiO}_2 \leq 0.25$  is feasible.  
33
- 34 • Our success rate 7 days after the extubation attempt (83%) is higher than that reported for  
35 extubation from conventional mechanical ventilation in ELBW infants.  
36
- 37 • A recruitment HFOV maneuver prior to surfactant administration may be helpful for  
38 successful extubation in ELBW infants.  
39  
40  
41  
42  
43  
44  
45  
46  
47  
48  
49  
50  
51  
52  
53  
54  
55  
56  
57  
58  
59  
60

## References

1. Support Study Group of the Eunice Kennedy Shriver NICHD Neonatal Research Network, Finer NN, Carlo WA, et al. Early CPAP versus surfactant in extremely preterm infants. *N Engl J Med* 2010; 362: 1970-9.
2. Morley CJ, Davis PG, Doyle LW, et al. Nasal CPAP or intubation at birth for very preterm infants. *N Engl J Med* 2008; 358 (7): 700-8.
3. Stoll BJ, Hansen NI, Bell EF, et al. Neonatal outcomes of extremely low birth weight infants from the NICHD neonatal research network. *Pediatrics* 2010; 126 (3): 443-56.
4. Miller JD, Carlo WA. Pulmonary complications of mechanical ventilation in neonates. *Clin Perinatol* 2008; 35 (1): 273-81.
5. Garland JS. Strategies to prevent ventilator-associated pneumonia in neonates. *Clin Perinatol* 2010; 37 (3): 629-43.
6. Walsh MC, Morris BH, Wrage La, et al. Extremely low birth weight neonates with protracted ventilation: mortality and 18-month neurodevelopmental outcomes. *J Pediatr* 2005; 146 (6): 798-804.
7. Sant'Anna GM, Keszler M. Weaning Infants from Mechanical Ventilation. *Clin Perinatol* 2012; (3):543-62
8. Vento G, Tortorolo L, Zecca E, et al: Spontaneous minute ventilation is a predictor of extubation failure in extremely-low-birth-weight infants. *J Matern Fetal Neonatal Med* 2004; 15: 147-54.
9. Dimitriou G, Greenough A, Endo A, et al: Prediction of extubation failure in preterm infants. *Arch Dis Child Fetal Neonatal Ed* 2002; 86 (1): F32-F35.
10. Szymankiewicz M, Vidyasagar D, Gadzinowski J: Predictors of successful extubation of preterm infants with respiratory distress syndrome. *Pediatr Crit Care Med* 2005; 6: 44-49.
11. Kamlin CO, Davis PG, Morley CJ: Predicting successful extubation of very low birth weight infants. *Arch Dis Child Fetal Neonatal Ed* 2006 May; 91(3): F180-F183.

12. Stefanescu BM, Murphy WP, Hansell BJ, et al. A randomized, controlled trial comparing two different continuous positive airway pressure systems for the successful extubation of extremely low birth weight infants. *Pediatrics* 2003; 112(5): 1031-8.
13. Giaccone A, Jensen E, Davis PG, et al. Definitions of extubation success in very premature infants: a systematic review. *Arch Dis Child Fetal Neonatal Ed.* 2014;99:F124-7.
14. Manley BJ, Doyle LW, Owen LS, et al. Extubating Extremely Preterm Infants: Predictors of Success and Outcomes following Failure. *J Pediatr.* 2016 Jun;173:45-9.
15. Cools F, Offringa M, Askie LM. Elective high frequency oscillatory ventilation versus conventional ventilation for acute pulmonary dysfunction in preterm infants. *Cochrane database Syst Rev.* 2015;3:CD000104.
16. Courtney SE, Durand DJ, Asselin JM, et al. High frequency oscillatory ventilation versus conventional mechanical ventilation for very low birth weight infants. *N Engl J Med* 2002; 347: 643-652.
17. Tana M, Zecca E, Tirone C, et al. Target fraction of inspired oxygen during open lung strategy in neonatal high frequency oscillatory ventilation: a retrospective study. *Minerva Anesthesiol* 2012;78(2):151-159.
18. Johnson AH, Peacock JL, Greenough A, et al: High-frequency oscillatory ventilation for the prevention of chronic lung disease of prematurity. *N Engl J Med* 2002; 347: 633-642.
19. Clark RH, Gerstmann DR, Null DM Jr, et al: Prospective randomized comparison of high-frequency oscillatory and conventional ventilation in respiratory distress syndrome. *Pediatrics* 1992; 89 (1): 5-12.
20. van Velzen A, De Jaegere A, van der Lee J, et al. Feasibility of weaning and direct extubation from open lung high-frequency ventilation in preterm infants. *Pediatr Crit Care Med.* 2009 Jan;10(1):71-5.

- 1  
2  
3 21. Vento G, Matassa PG, Ameglio F, et al. HFOV in premature neonates: effects on pulmonary  
4 mechanics and epithelial lining fluid cytokines. A randomized controlled trial. *Intensive*  
5 *Care Med* 2005;31:463-470.  
6  
7  
8  
9 22. Schimdt B, Roberts RS, Davis P, et al. Caffeine therapy for apnea of prematurity. *N Engl J*  
10 *Med.* 2006; 354 (20): 2112-21.  
11  
12  
13 23. Giannantonio C, Sammartino M, Valente E, et al. Remifentanil analgesedation in preterm  
14 newborns during mechanical ventilation. *Acta Paediatr* 2009;98(7):1111-1115.  
15  
16  
17 24. Buzzella B, Claire N, D'Ugard C, et al. A randomized controlled trial of two nasal  
18 continuous positive airway pressure levels after extubation in preterm infants. *J Pediatr*  
19 2014 Jan;164(1):46-51.  
20  
21  
22 25. Gizzi C, Montecchia F, Panetta V, et al. Is synchronised NIPPV more effective than NIPPV  
23 and NCPAP in treating apnoea of prematurity (AOP)? A randomised cross-over trial. *Arch*  
24 *Dis Child Fetal Neonatal Ed.* 2015 Jan;100(1):F17-23.  
25  
26  
27 26. Zhu X-W, Zhao J-N, Tang S-F, et al. Noninvasive high-frequency oscillatory ventilation  
28 versus nasal continuous positive airway pressure in preterm infants with moderate-severe  
29 respiratory distress syndrome: A preliminary report. *Pediatr Pulmonol.* 2017;1-5.  
30  
31  
32  
33  
34  
35  
36  
37  
38  
39  
40  
41  
42  
43  
44  
45  
46  
47  
48  
49  
50  
51  
52  
53  
54  
55  
56  
57  
58  
59  
60

**Table 1** Patient and maternal demographics, neonatal characteristics at the time of extubation.

|                                                       | All infants<br>n 108 | Extubation<br>Success<br>Group<br>n 90 (83%) | Extubation<br>Failure<br>Group<br>n 18 (17%) | p    |
|-------------------------------------------------------|----------------------|----------------------------------------------|----------------------------------------------|------|
| Gestational Age, wks                                  | 26.2 ± 1.4           | 26.3 ± 1.3                                   | 25.5 ± 1.4                                   | 0.02 |
| Birth Weight, g                                       | 742 ± 166            | 750 ± 168                                    | 703 ± 159                                    | 0.29 |
| Complete course of<br>Antenatal Steroids <sup>a</sup> | 50 (46)              | 42 (47)                                      | 8 (44)                                       | 1    |
| 5-min Apgar Score                                     | 8 [2-9]              | 7 [2-9]                                      | 8 [4-9]                                      | 0.50 |
| SGA                                                   | 31 (29)              | 27 (30)                                      | 4 (22)                                       | 0.58 |
| Male                                                  | 47 (44)              | 35 (39)                                      | 12 (67)                                      | 0.04 |
| Premature Rupture of Membranes<br>>12 h               | 38 (35)              | 29 (32)                                      | 9 (50)                                       | 0.18 |
| Delivery by caesarean section                         | 82 (76)              | 69 (77)                                      | 13 (72)                                      | 0.76 |
| Extubation weight g                                   | 739 ± 149            | 741 ± 154                                    | 732 ± 142                                    | 0.82 |
| Extubation attempt d                                  | 4 [1-53]             | 4 [1-53]                                     | 5 [1-19]                                     | 0.95 |
| Postnatal age at extubation, wks                      | 27.2 [24-32]         | 27.2 [24-32]                                 | 26.3 [25-30]                                 | 0.31 |

Values expressed as mean ± SD, median [range] and number (percent).<sup>a</sup> A complete course of antenatal steroids was defined as two doses of betamethasone administered more than 24 hours but no more than 7 days before delivery; SGA: small for gestational age.

**Table 2** Ventilator settings, ventilation and transcutaneous blood gas values at baseline, pre-surfactant and at extubation time.

|                                                        | <b>Extubation<br/>Success<br/>Group</b> | <b>Extubation<br/>Failure<br/>Group</b> | <b>p</b>         |
|--------------------------------------------------------|-----------------------------------------|-----------------------------------------|------------------|
| <i>Baseline</i>                                        |                                         |                                         |                  |
| MAP (cmH <sub>2</sub> O)                               | 10.2 ± 1.1                              | 10.2 ± 1.0                              | 0.94             |
| FiO <sub>2</sub>                                       | 0.40 ± 0.17                             | 0.48 ± 0.24                             | 0.08             |
| Amplitude (%)                                          | 59 ± 33                                 | 56 ± 32                                 | 0.72             |
| Frequency (Hz)                                         | 9.6 ± 1.0                               | 9.7 ± 0.8                               | 0.69             |
| V <sub>T</sub> (ml/kg)                                 | 1.6 ± 0.6                               | 1.5 ± 0.5                               | 0.51             |
| DCO <sub>2</sub> (ml <sup>2</sup> /kg <sup>2</sup> /s) | 25 ± 15                                 | 25 ± 10                                 | 1                |
| TcPO <sub>2</sub> (mmHg)                               | 53 ± 12                                 | 50 ± 8                                  | 0.31             |
| TcPCO <sub>2</sub> (mmHg)                              | 52 ± 8                                  | 54 ± 4                                  | 0.30             |
| <i>Pre-surfactant</i>                                  |                                         |                                         |                  |
| MAP (cmH <sub>2</sub> O)                               | 13.1 ± 1.6                              | 11.9 ± 2.4                              | <b>0.02</b>      |
| FiO <sub>2</sub>                                       | 0.25 ± 0.01                             | 0.33 ± 0.08                             | <b>&lt;0.001</b> |
| Amplitude (%)                                          | 76 ± 30                                 | 62 ± 31                                 | 0.08             |
| Frequency (Hz)                                         | 9.3 ± 1.0                               | 9.6 ± 0.9                               | 0.30             |
| V <sub>T</sub> (ml/kg)                                 | 1.9 ± 0.6                               | 1.8 ± 0.4                               | 0.52             |
| DCO <sub>2</sub> (ml <sup>2</sup> /kg <sup>2</sup> /s) | 29 ± 15                                 | 29 ± 10                                 | 1                |
| TcPO <sub>2</sub> (mmHg)                               | 59 ± 16                                 | 54 ± 11                                 | 0.23             |
| TcPCO <sub>2</sub> (mmHg)                              | 46 ± 9                                  | 50 ± 4                                  | 0.08             |
| <i>Extubation</i>                                      |                                         |                                         |                  |
| MAP (cmH <sub>2</sub> O)                               | 6.1 ± 0.9                               | 6.1 ± 1.2                               | 0.97             |
| FiO <sub>2</sub>                                       | 0.22 ± 0.03                             | 0.23 ± 0.02                             | 0.30             |
| Amplitude (%)                                          | 43 ± 24                                 | 39 ± 12                                 | 0.46             |
| Frequency (Hz)                                         | 9.3 ± 1.2                               | 9.3 ± 0.7                               | 0.88             |
| V <sub>T</sub> (ml/kg)                                 | 2.1 ± 0.6                               | 1.9 ± 0.6                               | 0.28             |
| DCO <sub>2</sub> (ml <sup>2</sup> /kg <sup>2</sup> /s) | 34 ± 11                                 | 35 ± 15                                 | 0.70             |



|                           |        |        |      |
|---------------------------|--------|--------|------|
| TcPO <sub>2</sub> (mmHg)  | 56 ± 5 | 54 ± 3 | 0.08 |
| TcPCO <sub>2</sub> (mmHg) | 48 ± 3 | 49 ± 2 | 0.18 |

Values expressed as mean ± SD; MAP: mean airways pressure. TcPO<sub>2</sub>: transcutaneous partial pressure of O<sub>2</sub>; TcPCO<sub>2</sub>: transcutaneous partial pressure of CO<sub>2</sub>; V<sub>T</sub>: Tidal Volume HFOV; DCO<sub>2</sub>: coefficient of gas transport.

Confidential: For Review Only

**Table 3** Mortality and respiratory outcomes.

|                        | <b>Extubation<br/>Success<br/>Group</b> | <b>Extubation<br/>Failure<br/>Group</b> | <b>p</b>     |
|------------------------|-----------------------------------------|-----------------------------------------|--------------|
| Mortality              | 11(12)                                  | 1(5)                                    | 0.68         |
| > 1 dose of surfactant | 19 (21)                                 | 10 (56)                                 | <b>0.006</b> |
| Total ventilator d     | 8 [0.3-137]                             | 16 [0.5-84]                             | <b>0.02</b>  |
| Total oxygen d         | 31 [0-200]                              | 41 [0.4-193]                            | 0.18         |
| BPD*                   | 16/79 (20)                              | 6/17 (35)                               | 0.20         |

Values expressed as median [range] and number (percent). BPD: bronchopulmonary dysplasia.

\*Data are referred to >36 weeks postmenstrual age survivors babies only.

**Table 4** Risks factors for Extubation Outcome: multivariable analysis

| Extubation Success Group                       | OR   | 95% CI     | p           |
|------------------------------------------------|------|------------|-------------|
| Gestational Age (weeks)                        | 1.71 | 1.04, 2.08 | <b>0.03</b> |
| Male                                           | 3.08 | 0.85, 11.2 | 0.09        |
| MAP (cmH <sub>2</sub> O) <i>pre-surfactant</i> | 1.51 | 1.06, 2.15 | <b>0.02</b> |
| FiO <sub>2</sub> <i>pre-surfactant</i>         | 0.06 | 0.00, 1.57 | 0.09        |
| > 1 dose of surfactant                         | 0.31 | 0.09, 1.16 | 0.08        |

FiO<sub>2</sub>: fraction of inspired oxygen; MAP: mean airways pressure.



**Fig. 1 Infants flow diagram during the study period**

HFOV: High-frequency oscillatory ventilation; CPAP: continuous positive airway pressure

431x610mm (300 x 300 DPI)
